# Supplementary material
Source: publisher site journal article supplement (https://en-cdn.bio-protocol.org/attached/file/20200616/3679%20Supplementary%20Figures.docx)
Supplement: Supplementary file 1 [file 3679%20Supplementary%20Figures.docx]

**Supplementary Figures**


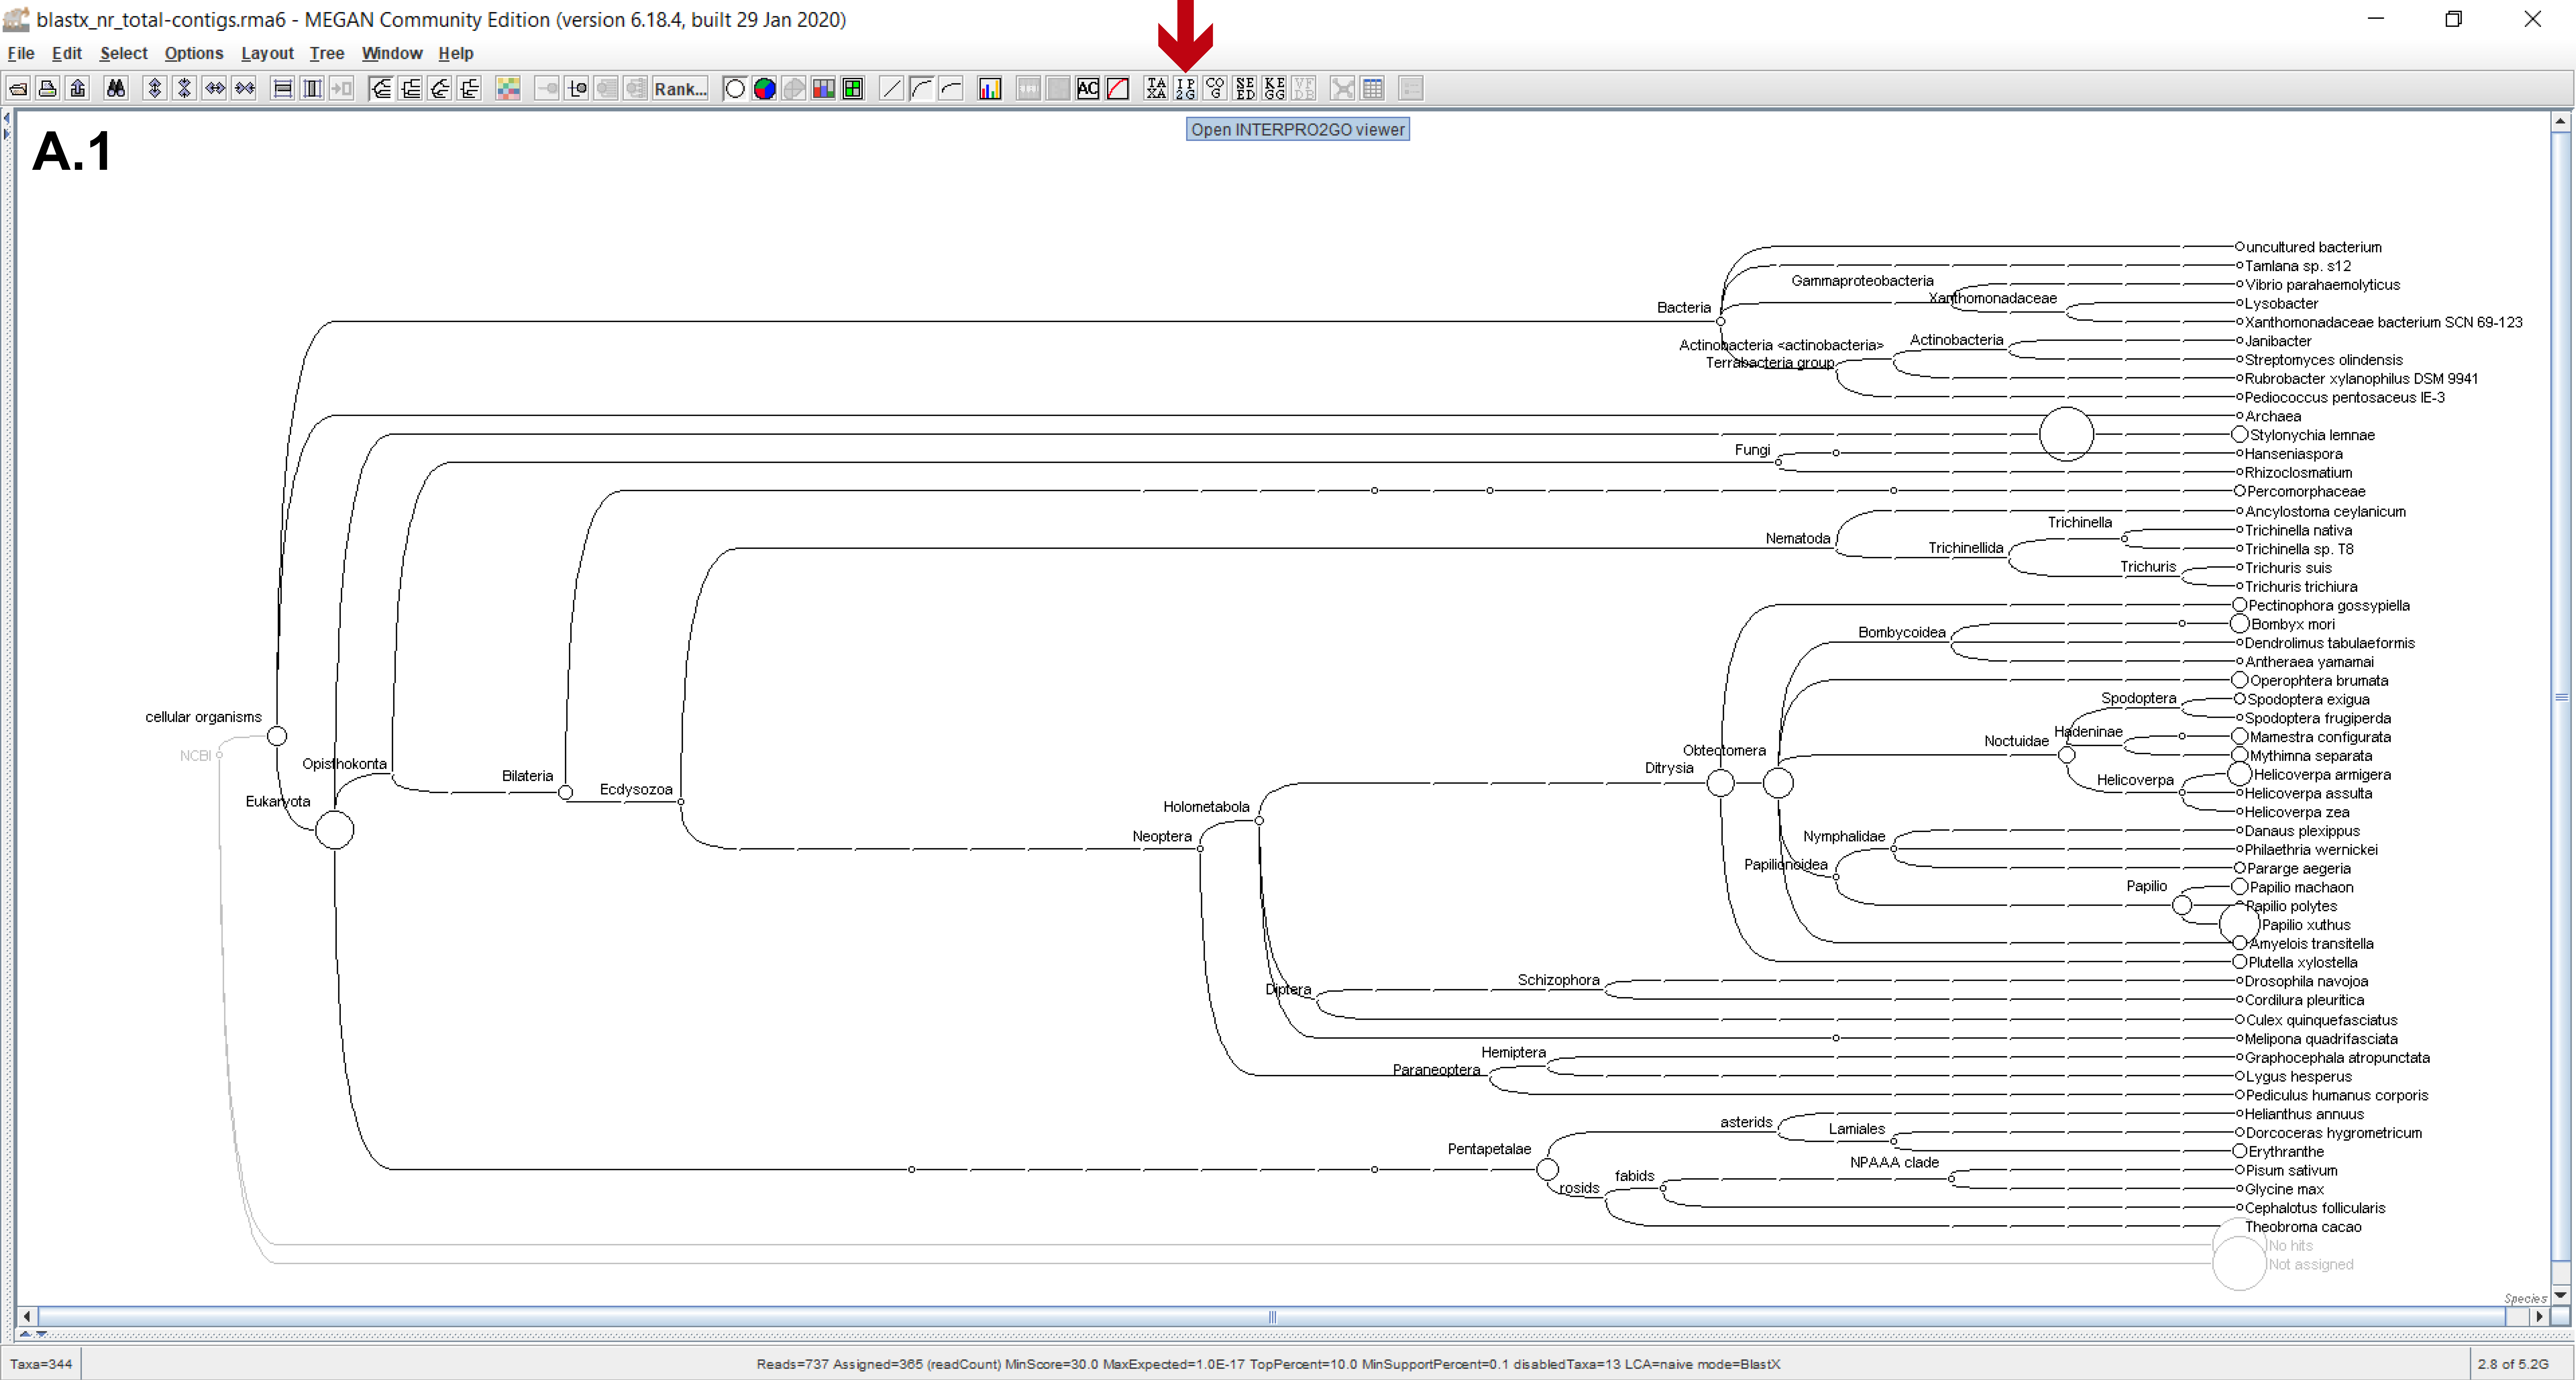


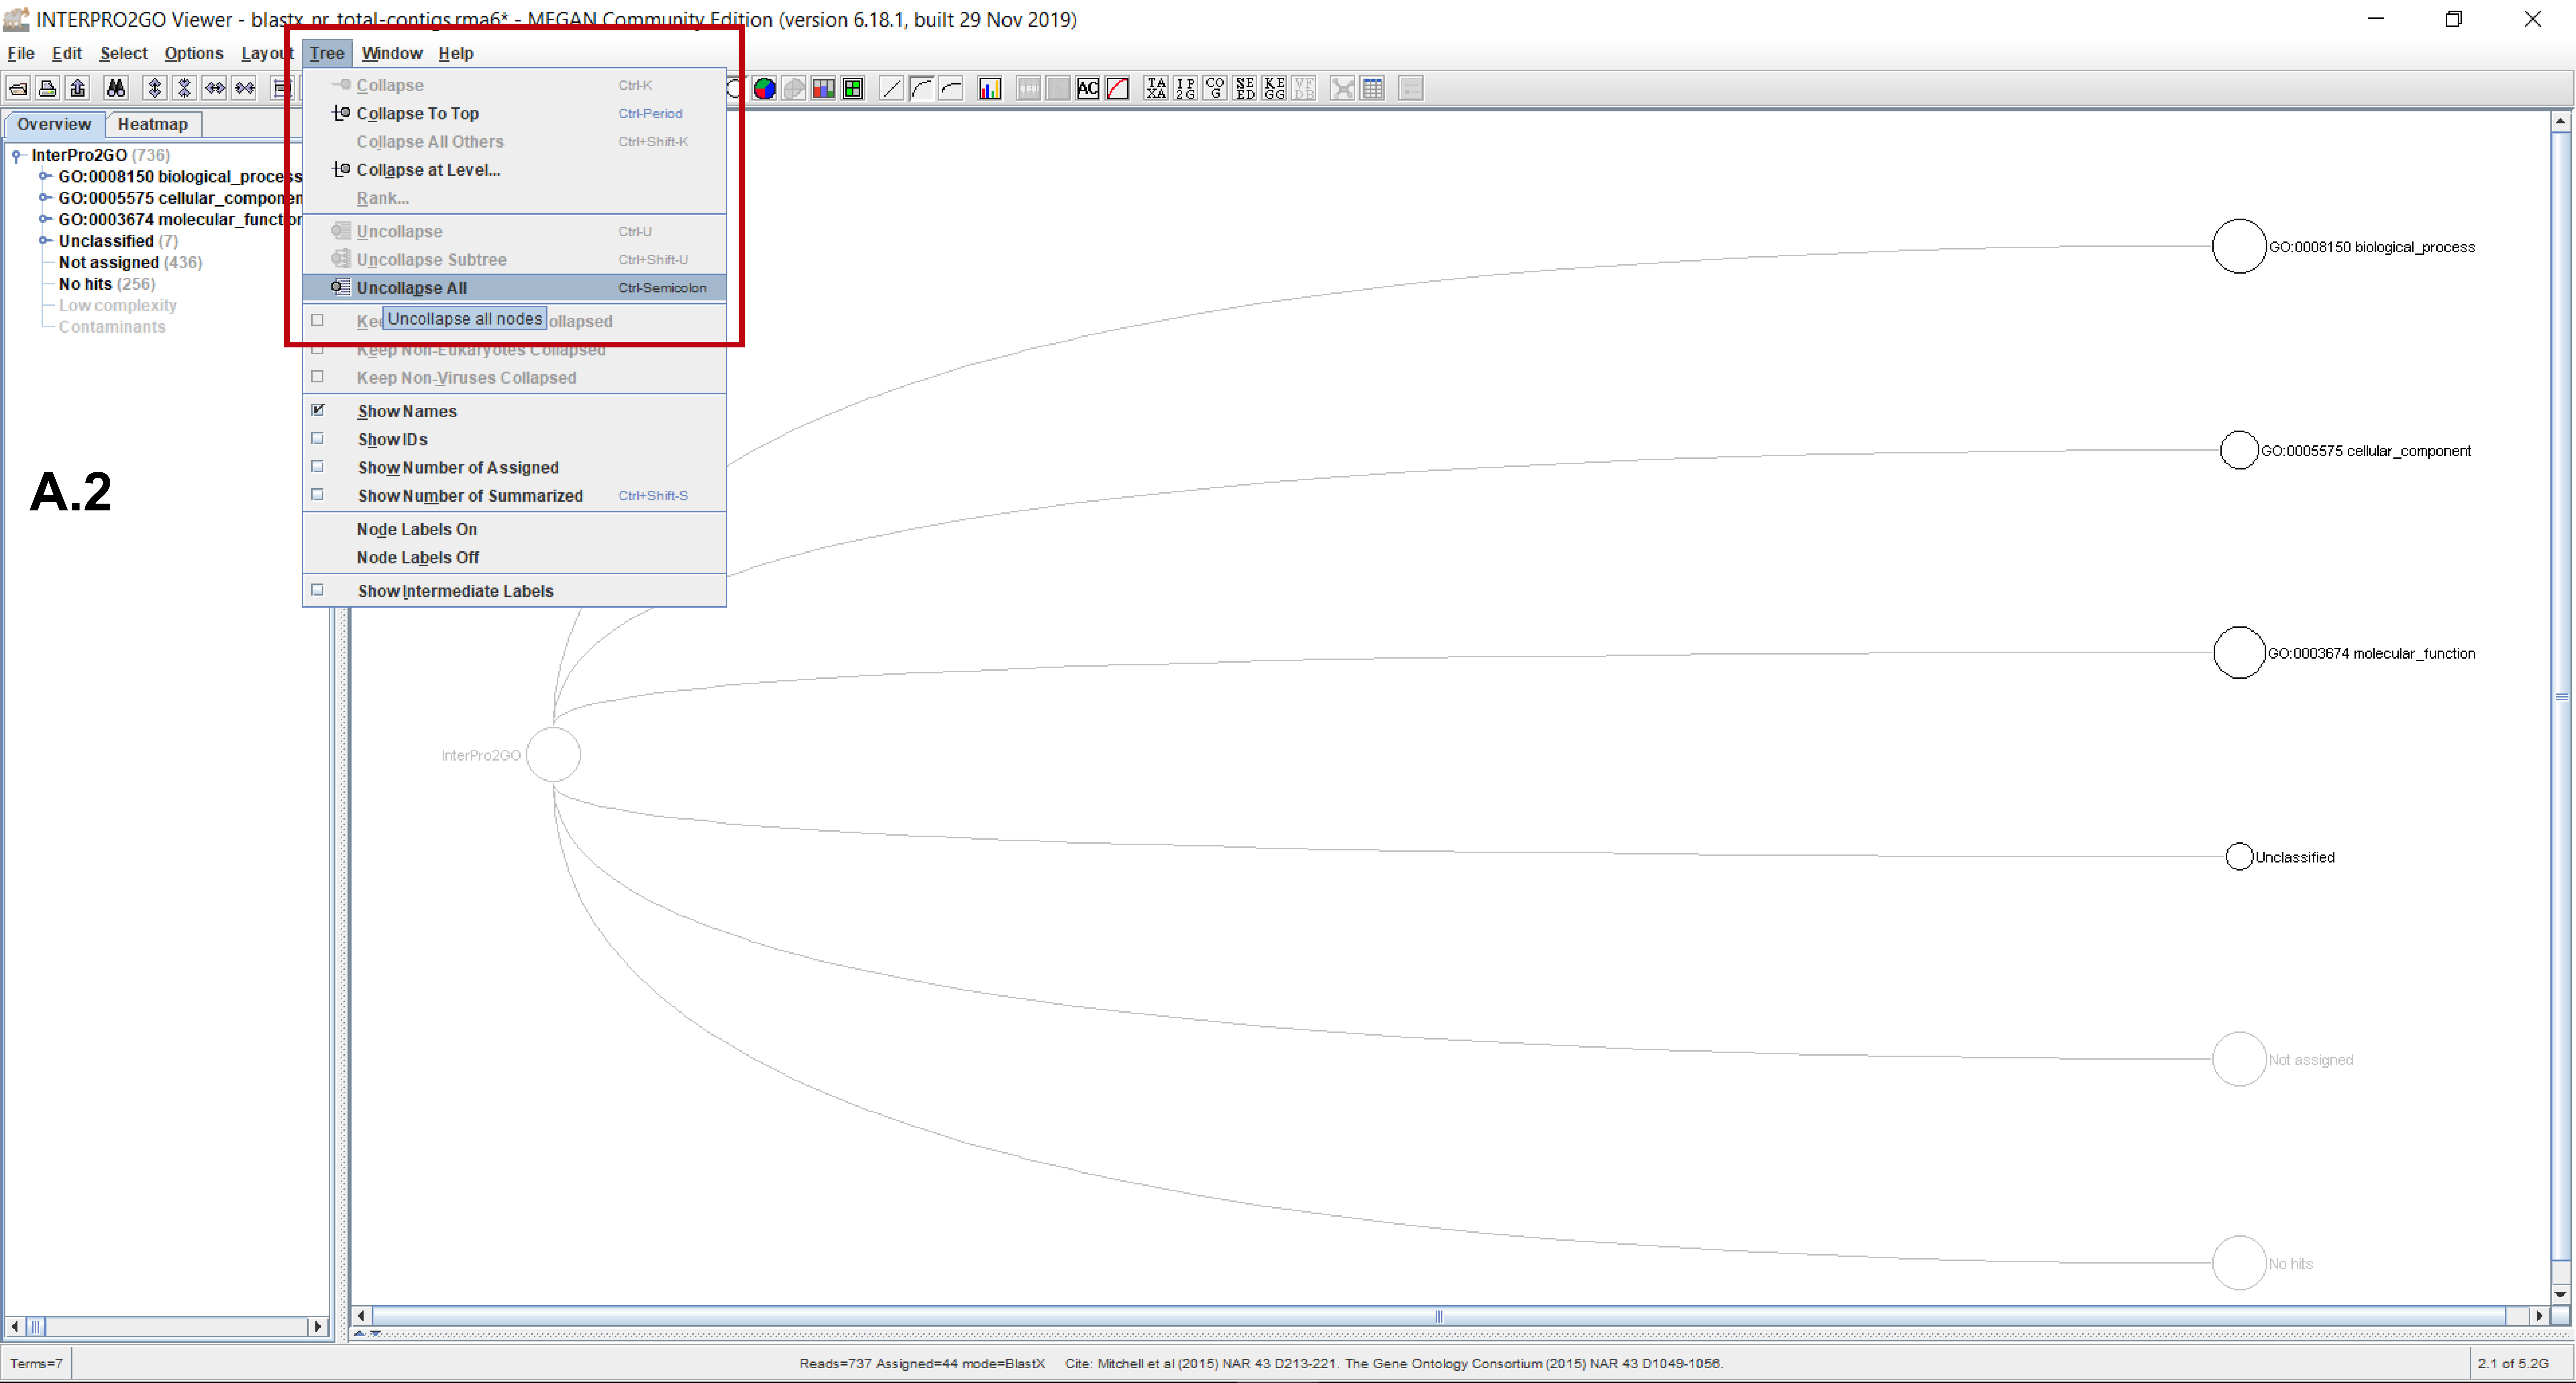


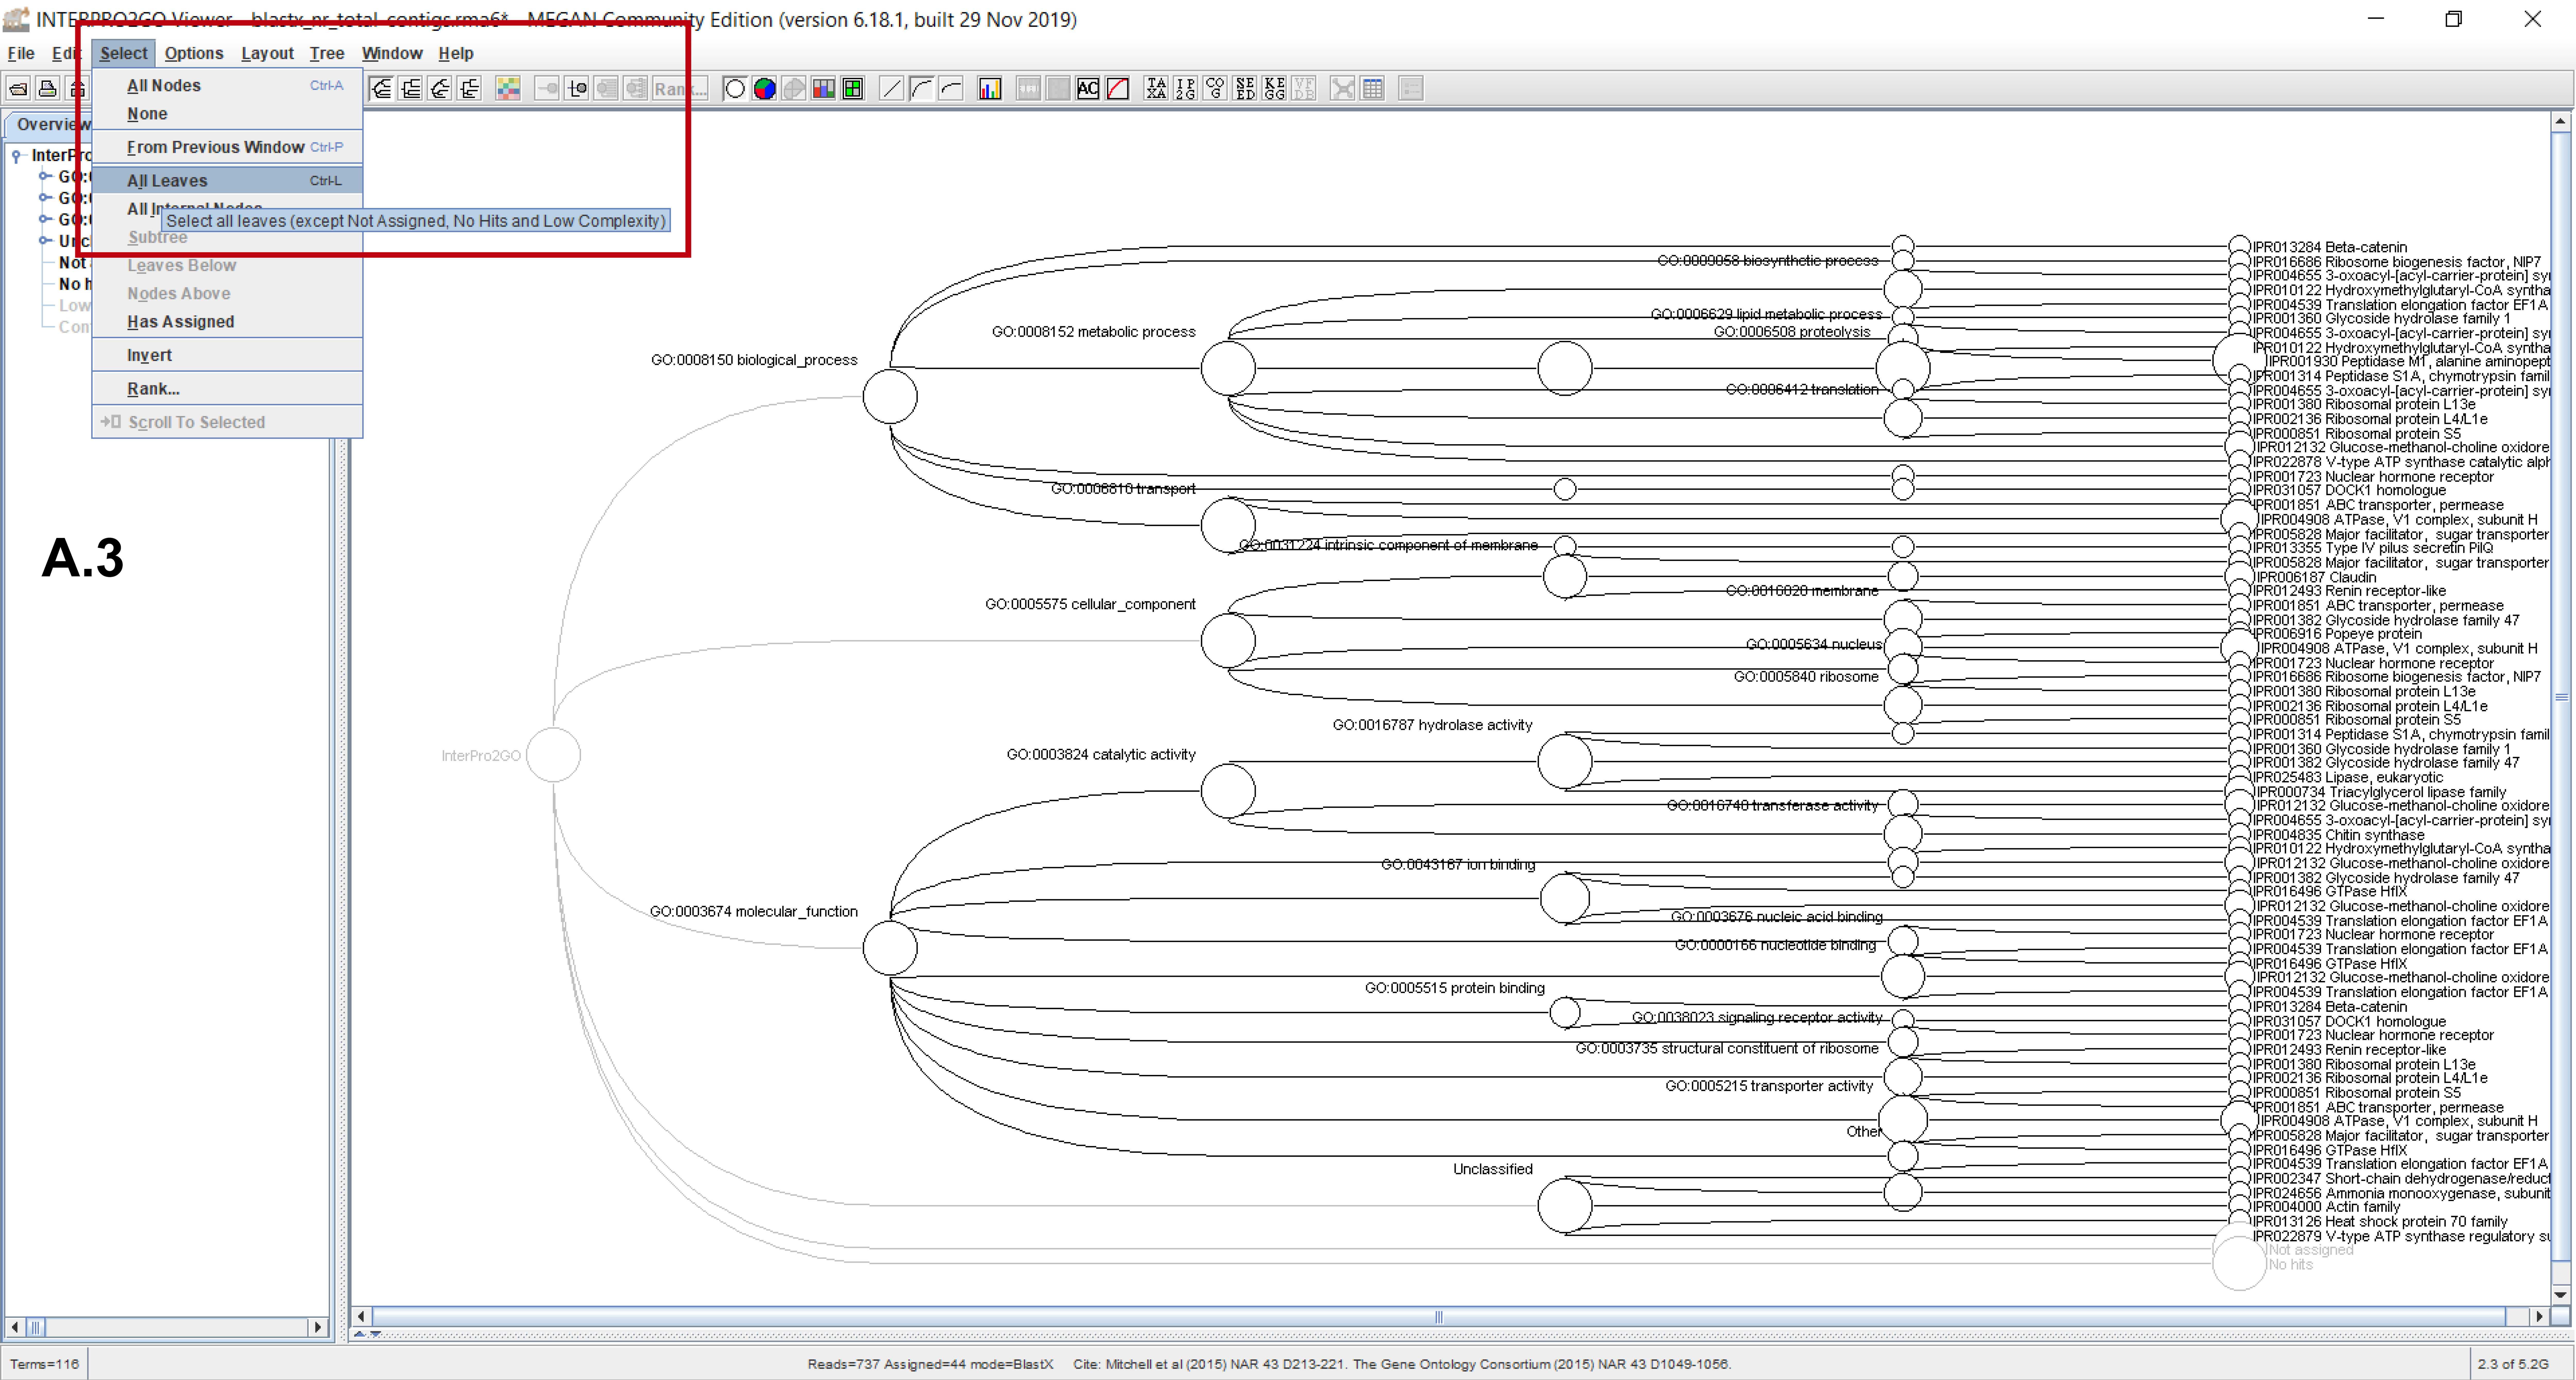


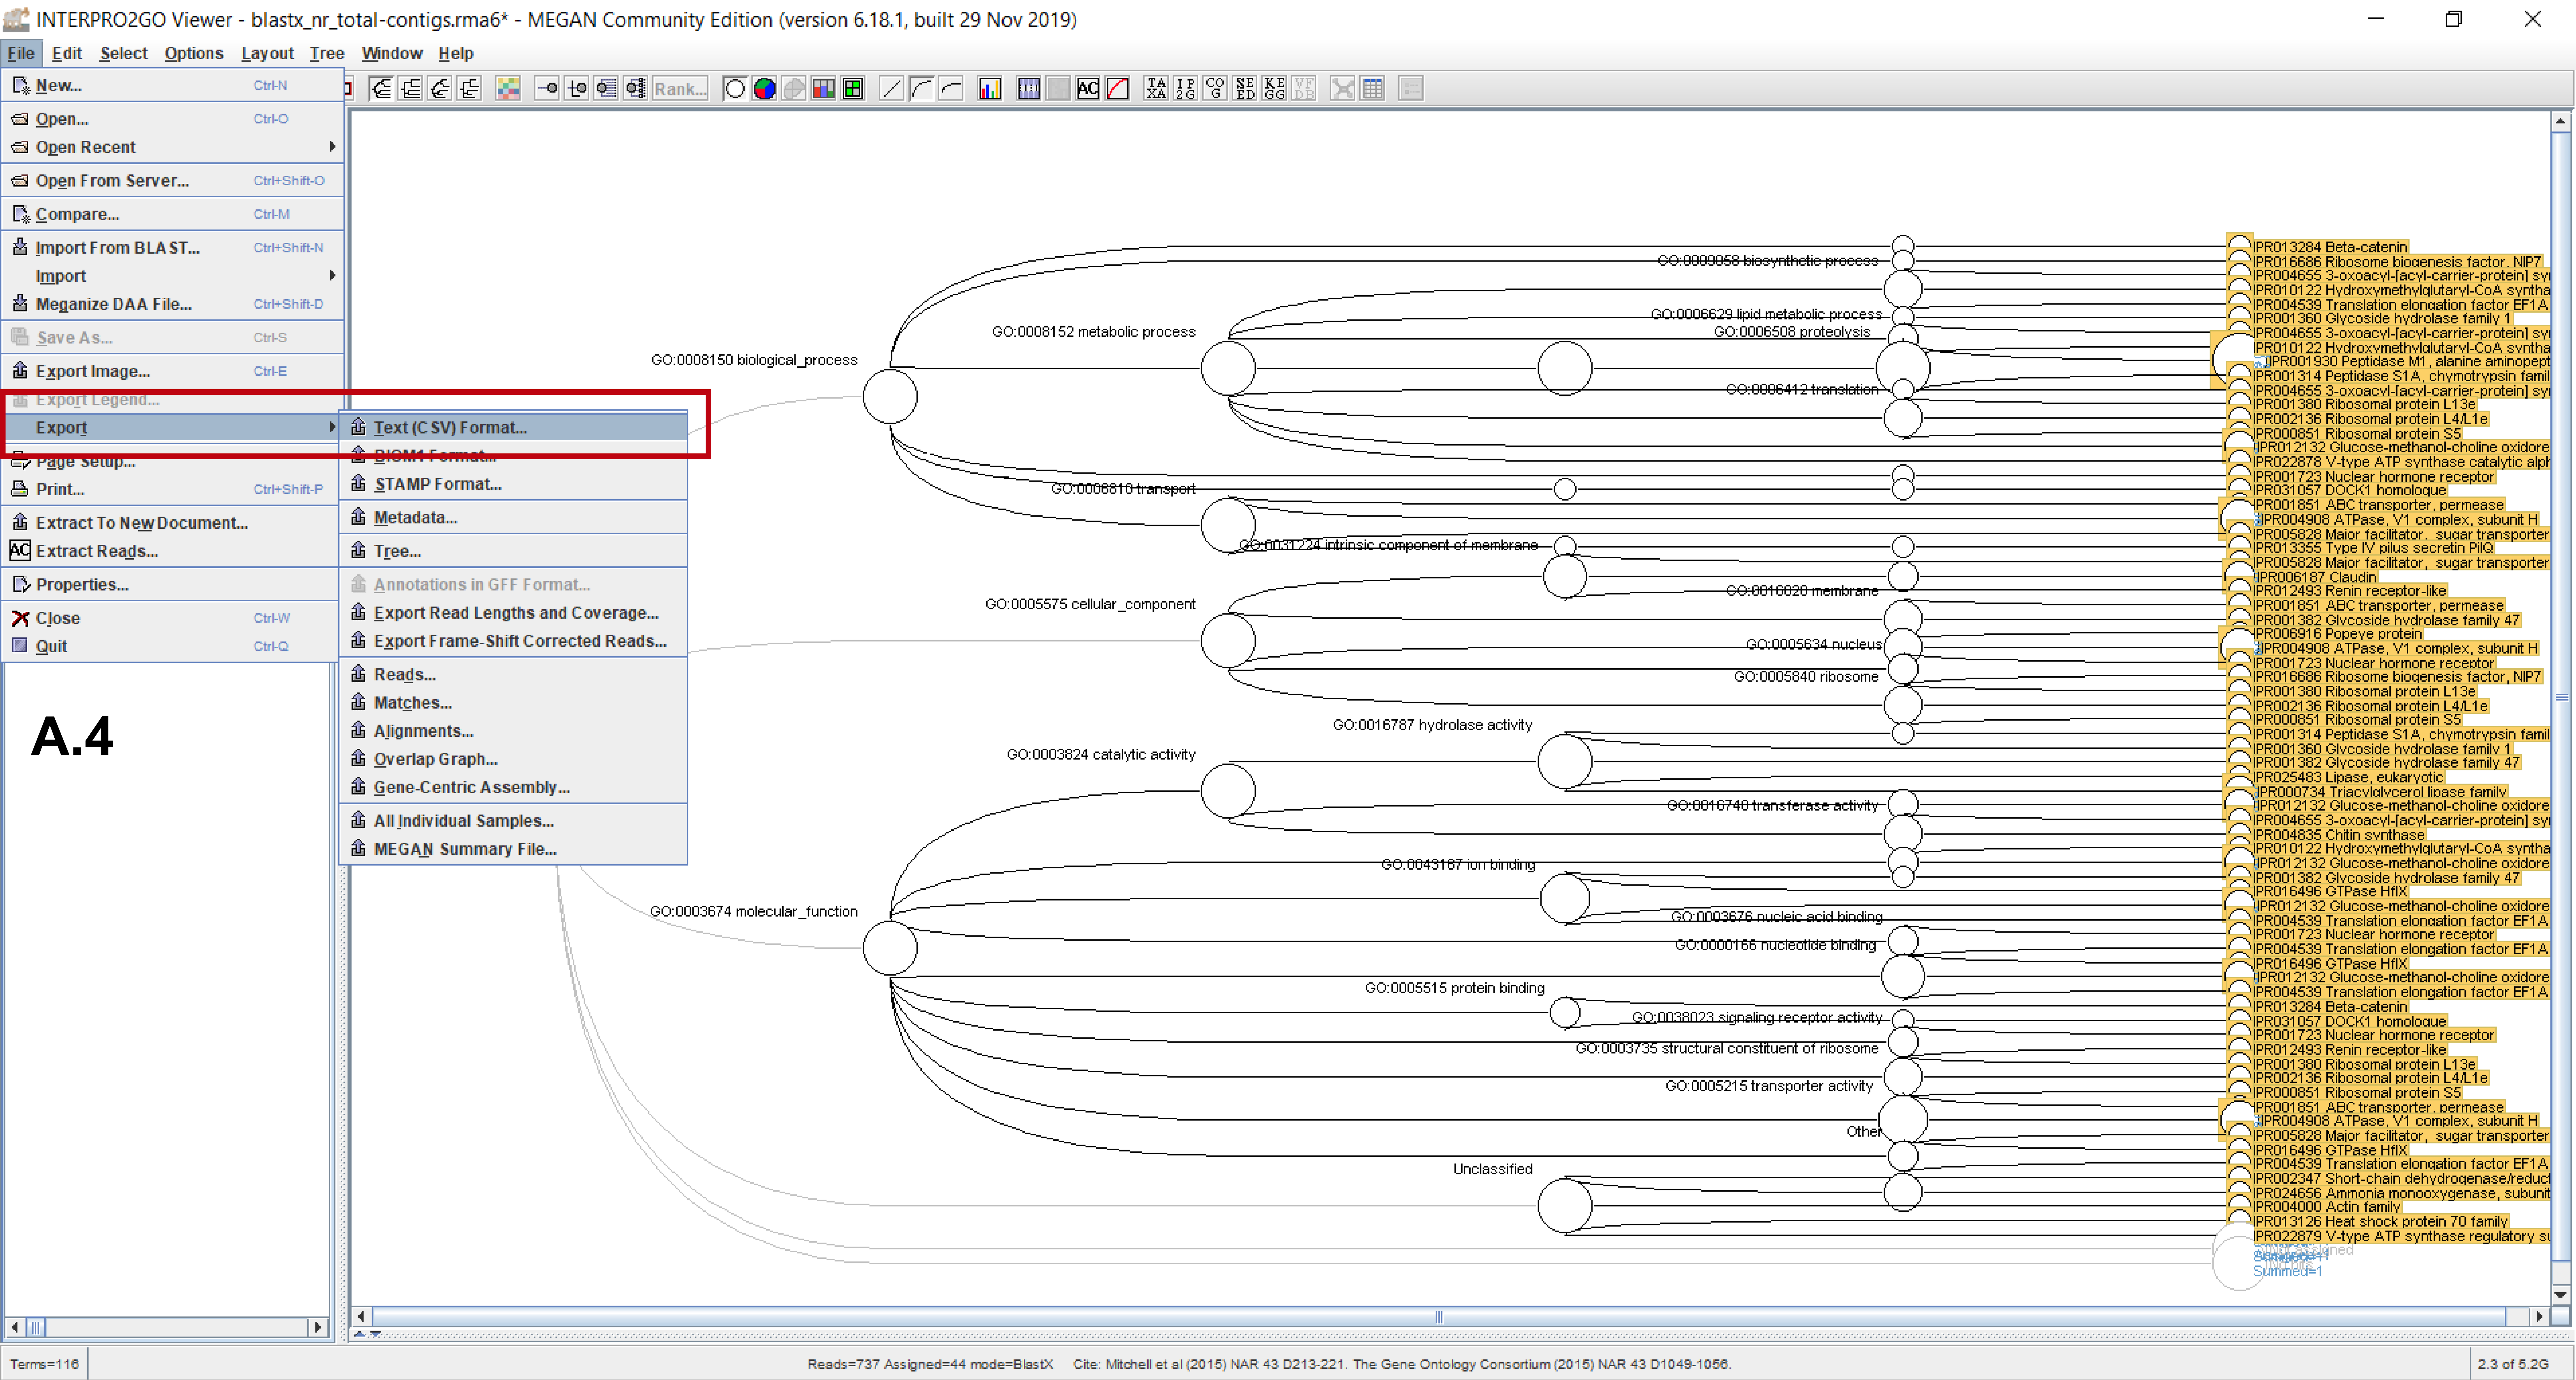


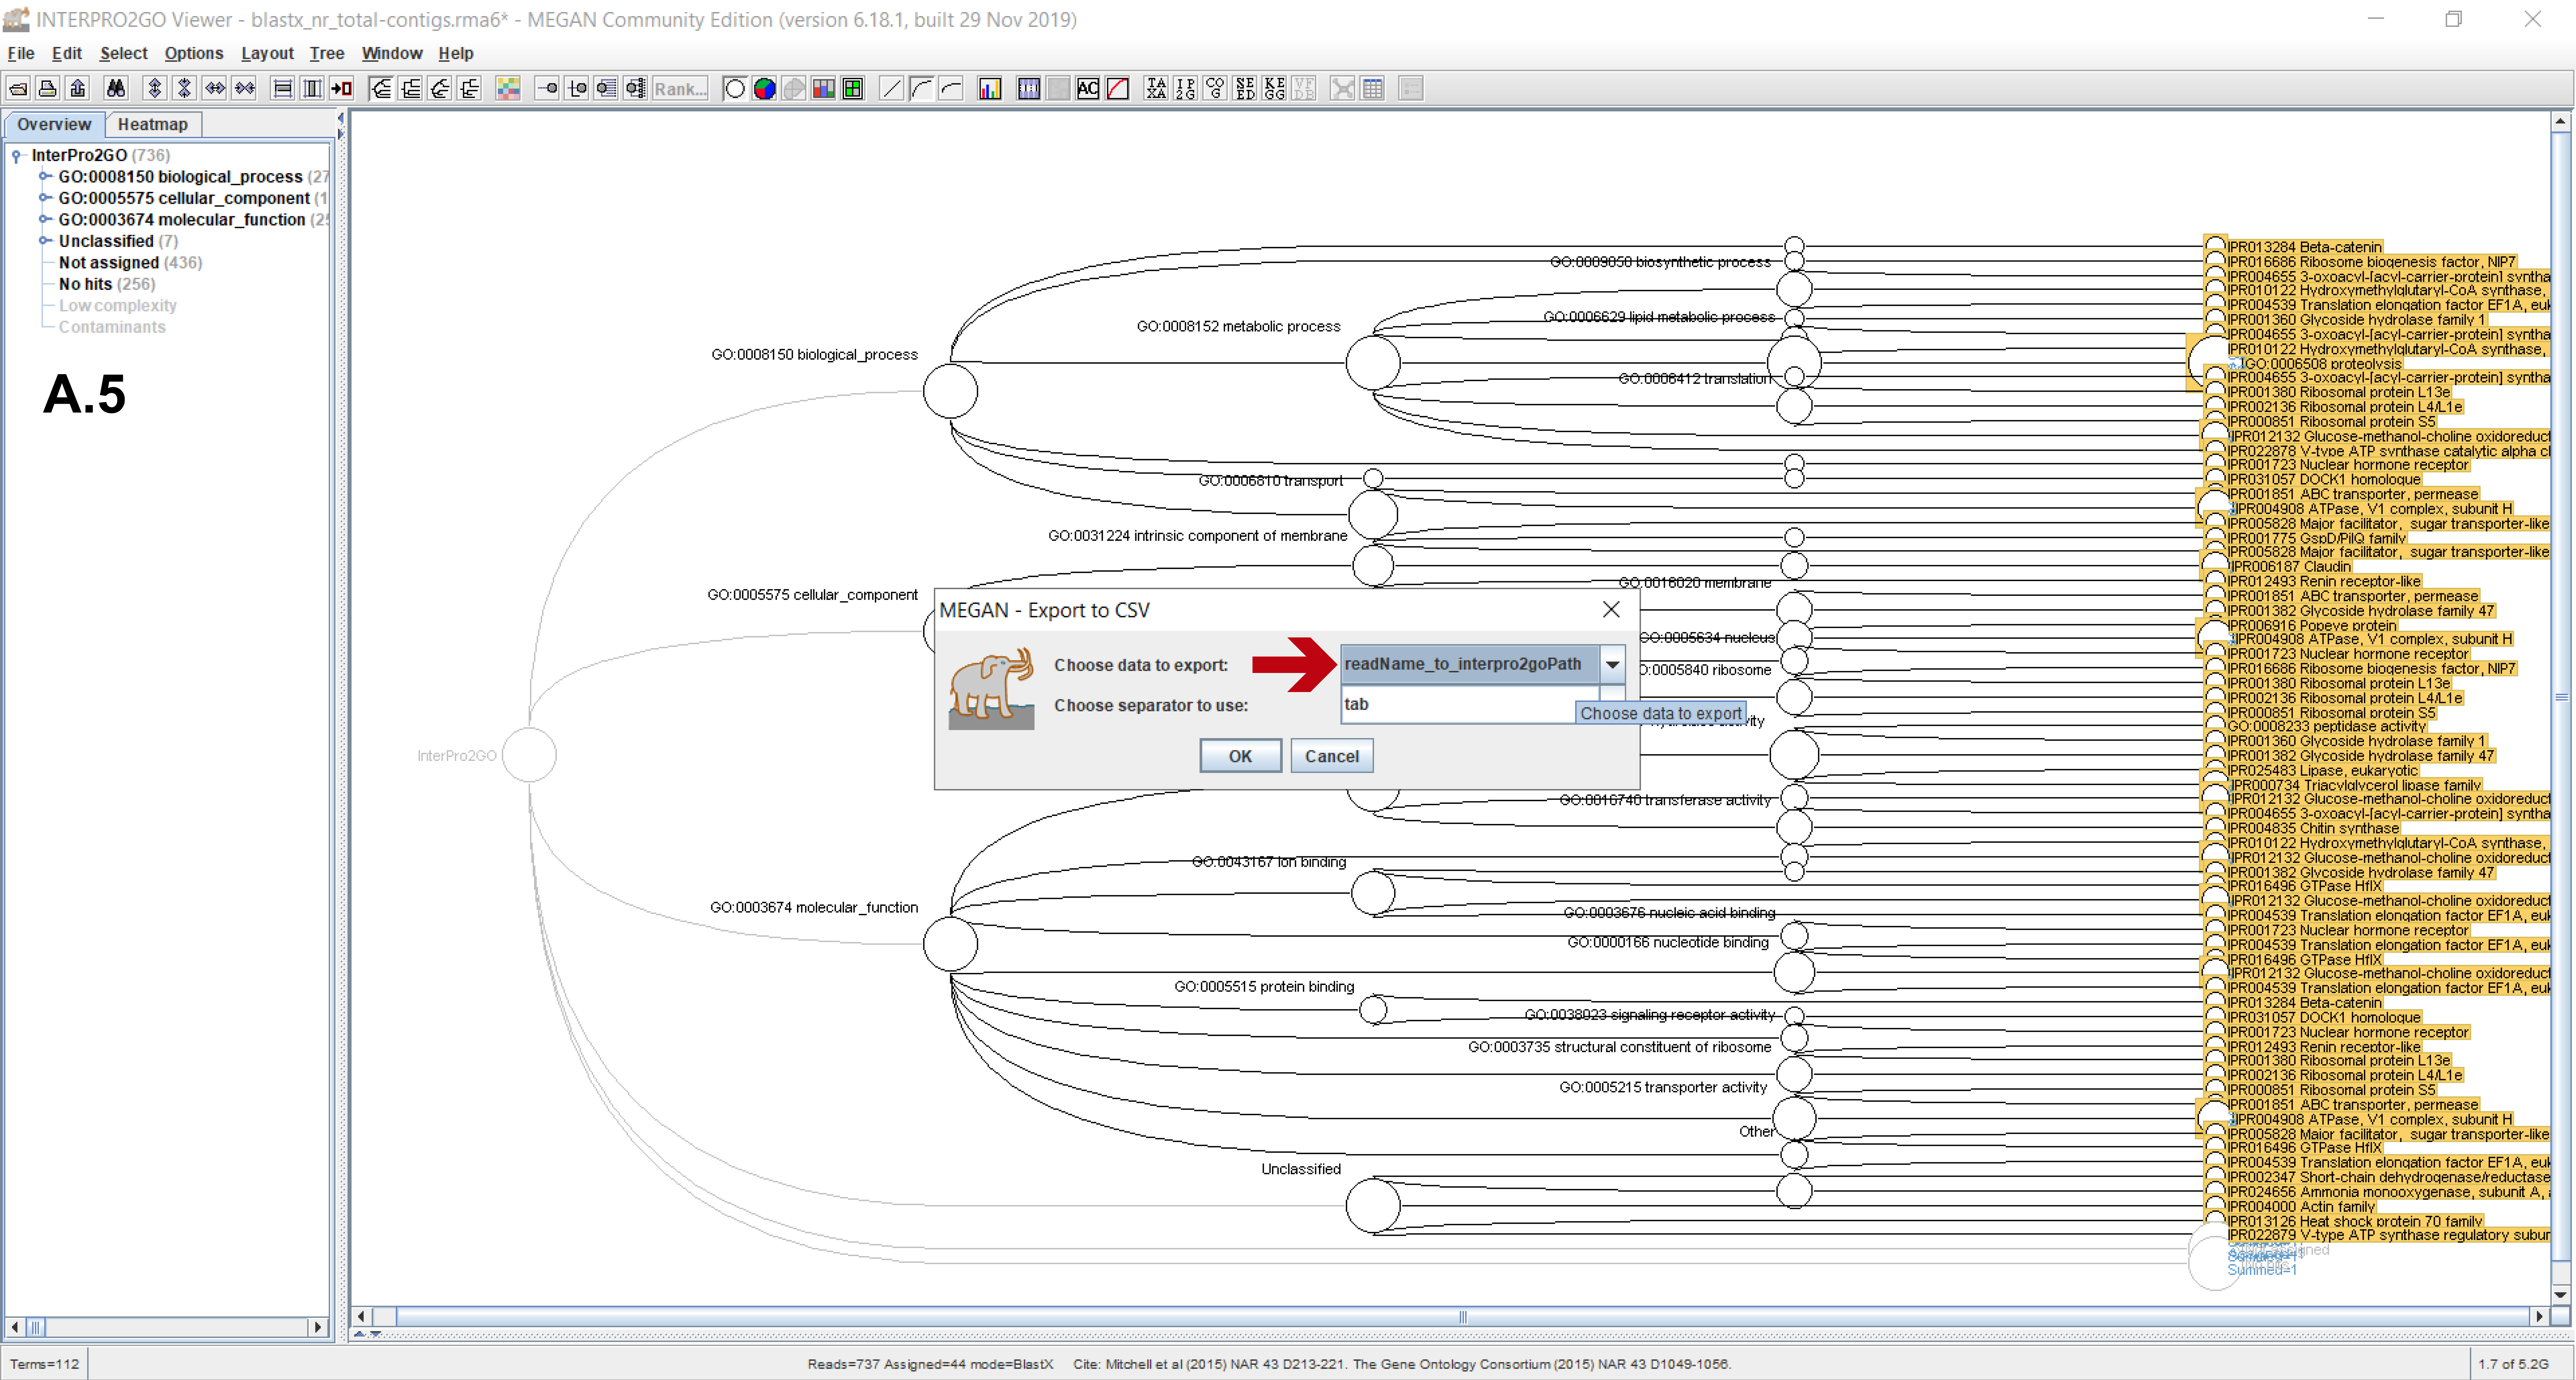


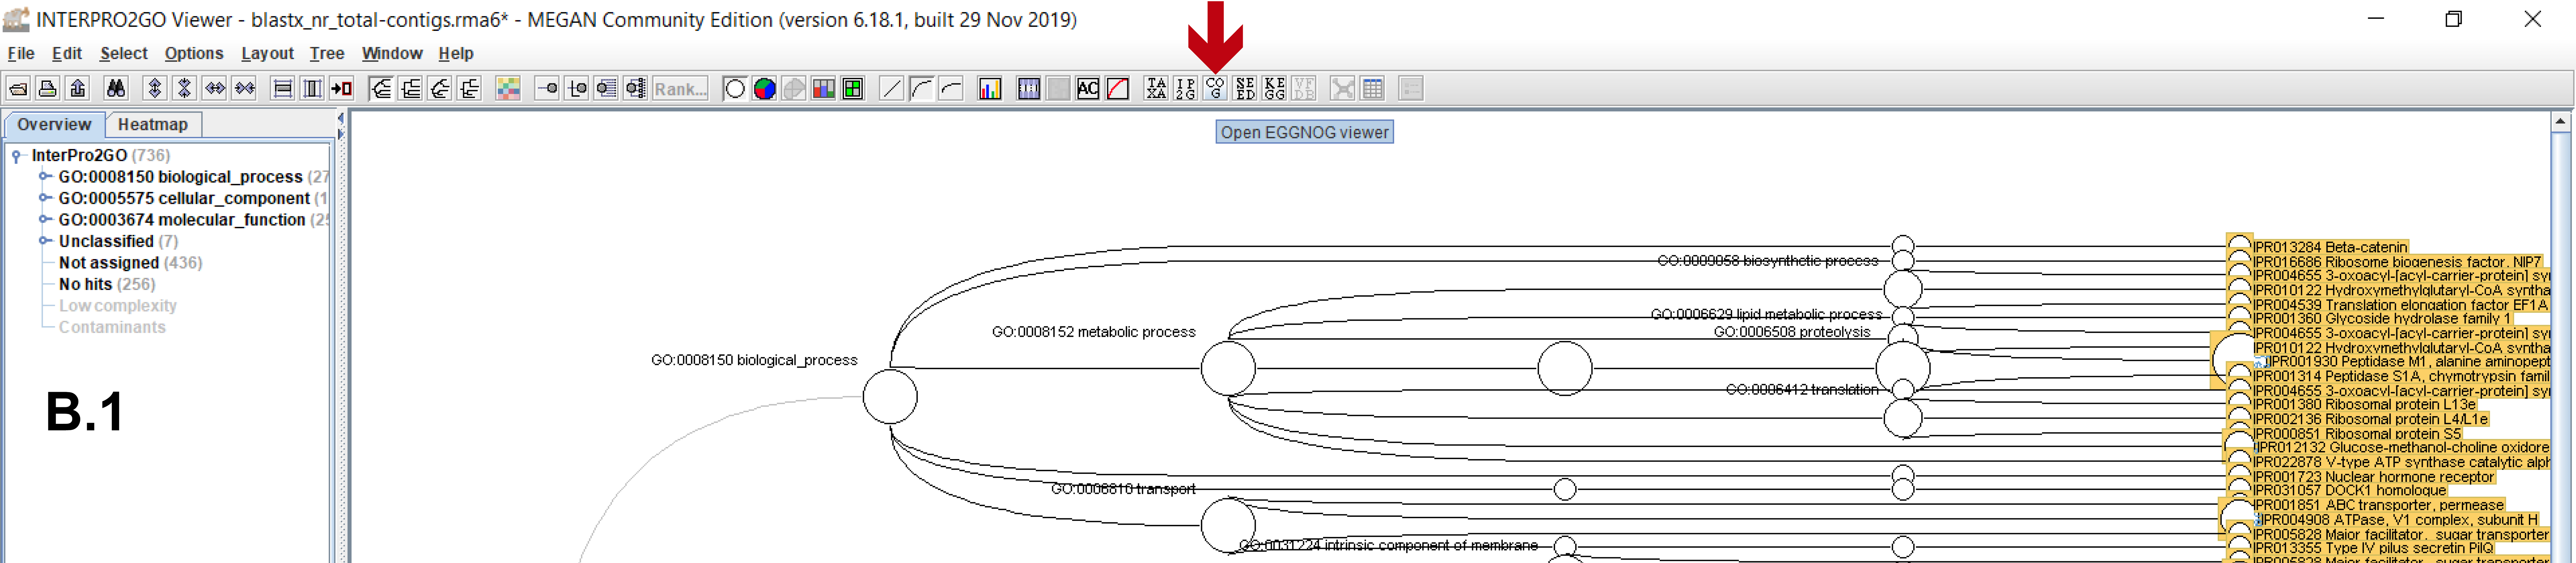


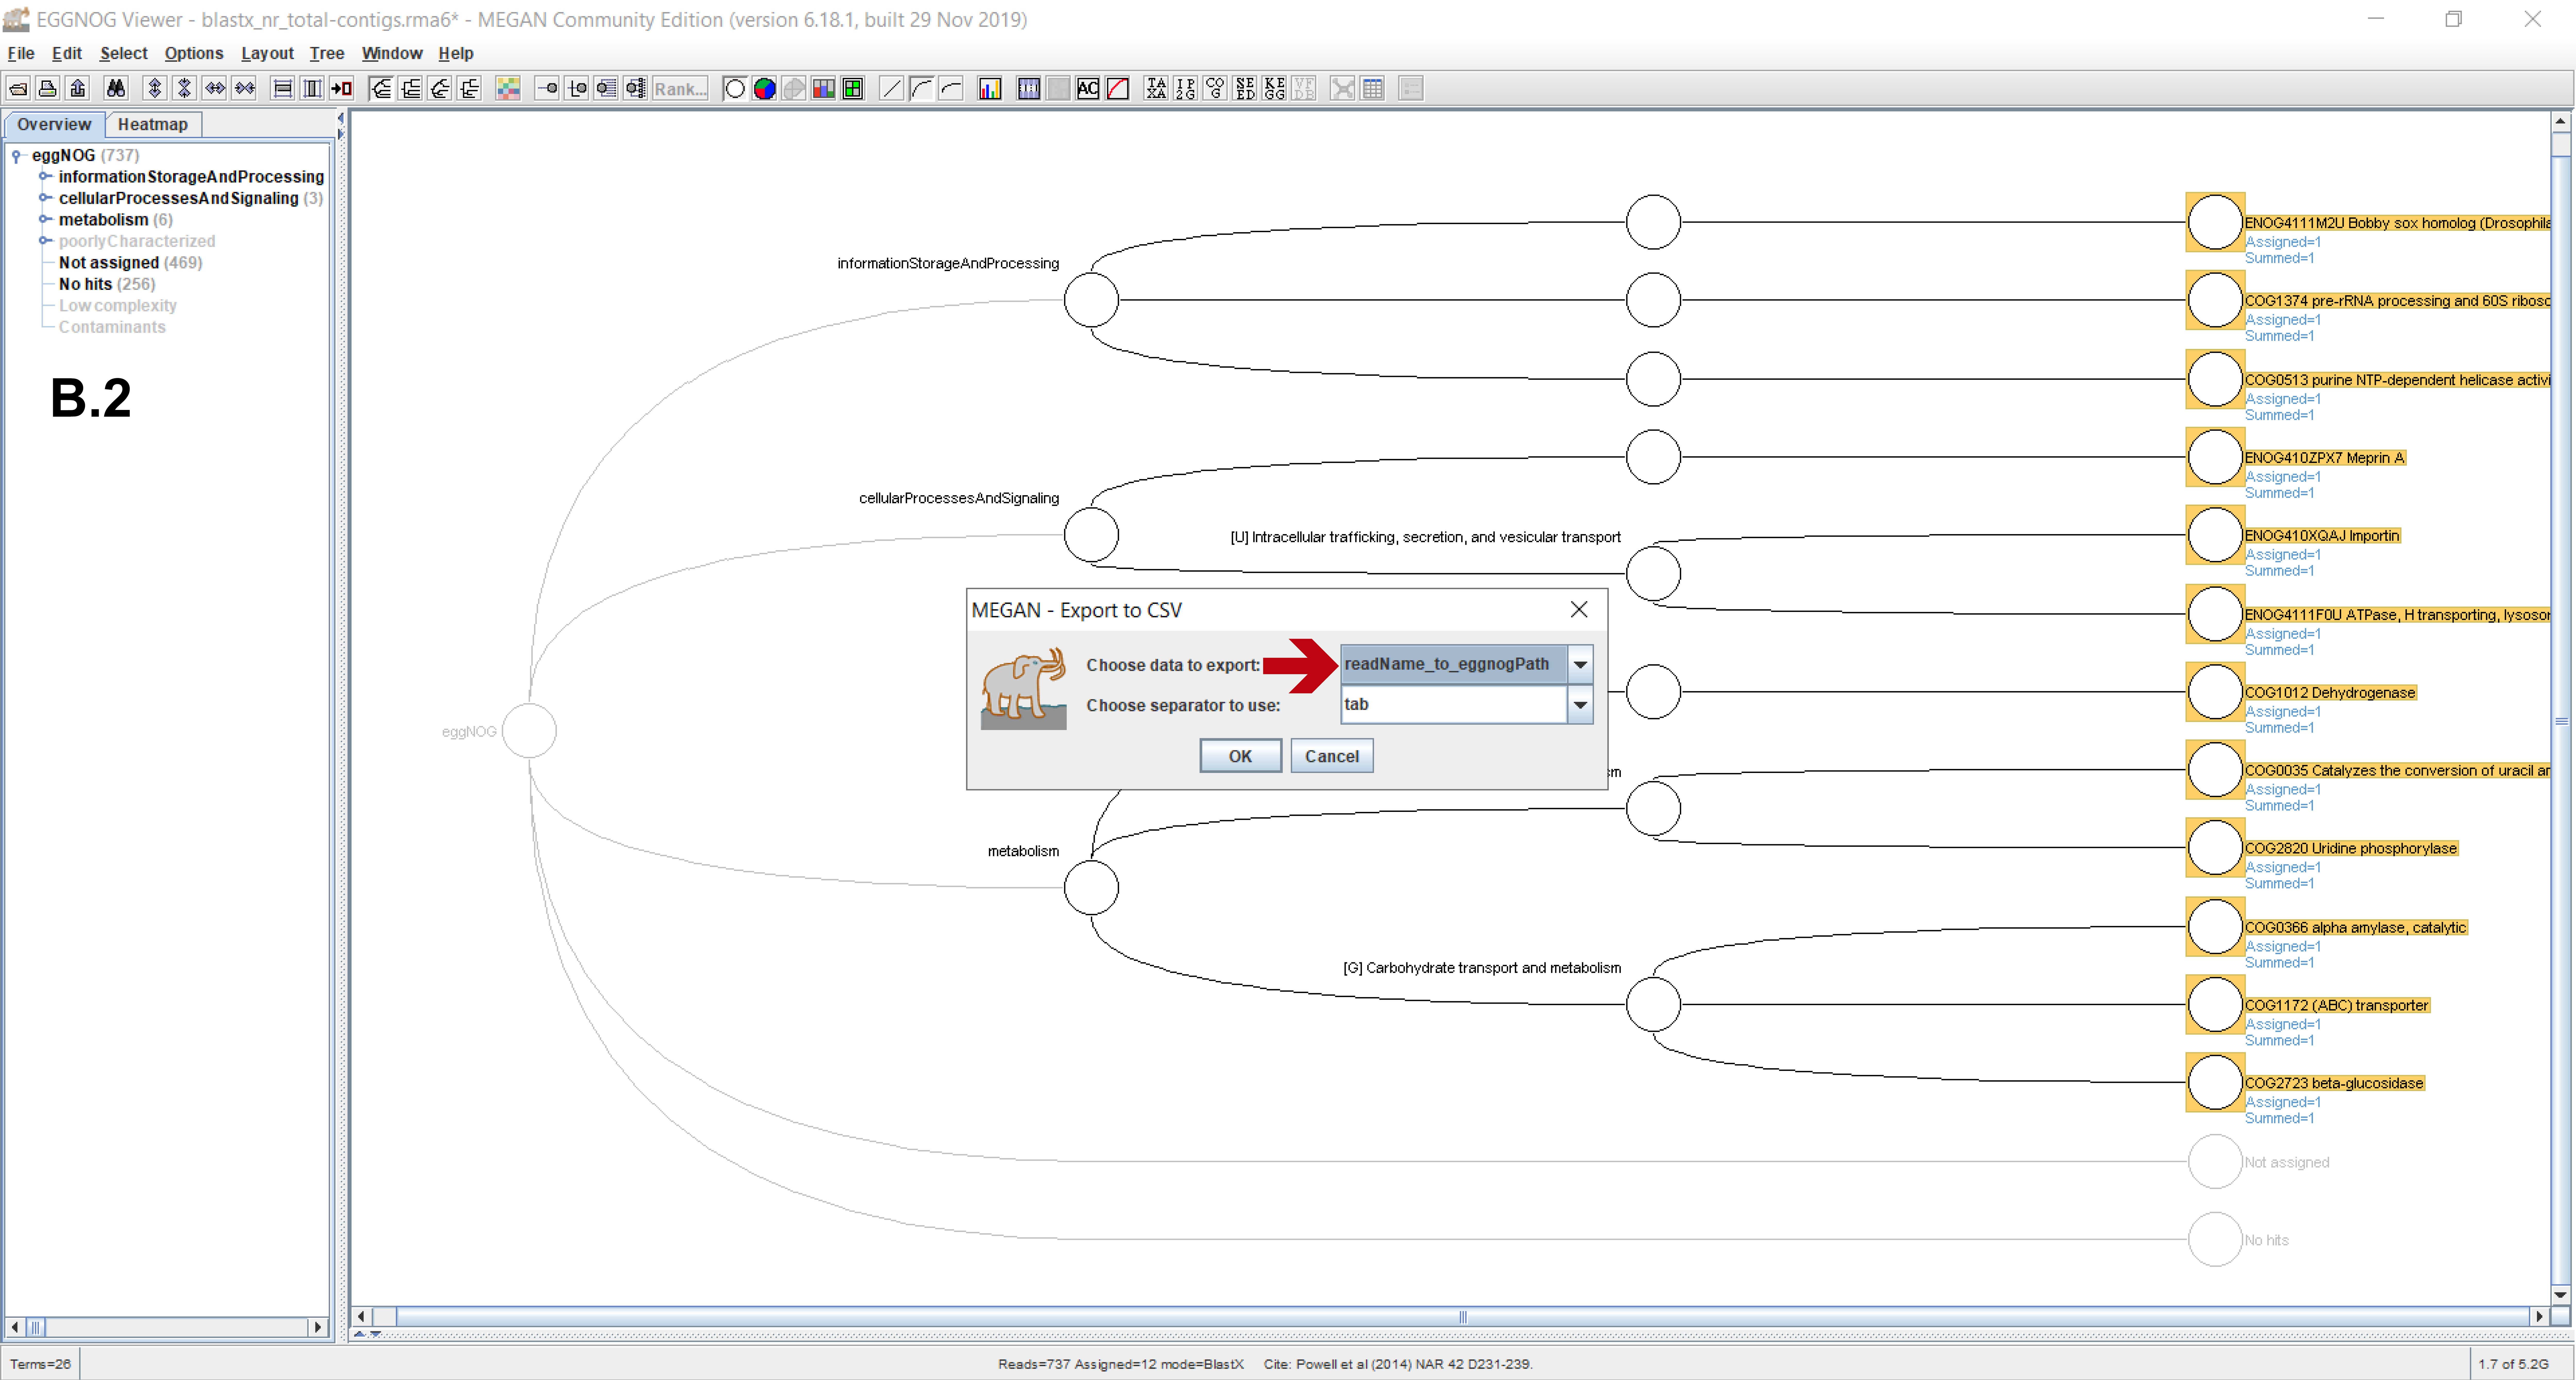


**Figure S1. Exporting functional assignments in MEGAN.** **A. From InterPro2GO:** 1) Click the “IP2G” icon (red arrow). 2) Select “Uncollapse All” from the “Tree” leaf (red rectangle). 3) Select “All Leaves” from the “Select” leaf (red rectangle). 4) Select “Export” from the “File” leaf, and choose “Text (CSV) format” from the dropdown menu (red rectangle). 5) Select “readName_to_interpro2goPath” from the “Choose data to export” dropdown menu, and “tab” from the “Choose separator to use” dropdown menu (red arrow). **B. From EggNOG:** 1) Click the EggNOG icon (COG; red arrow); follow the same steps as for InterPro2GO (1 through 4) and 2) then select “readName_to_eggnogPath” from the “Choose data to export” dropdown menu, and “tab” from the “Choose separator to use” dropdown menu (red arrow).


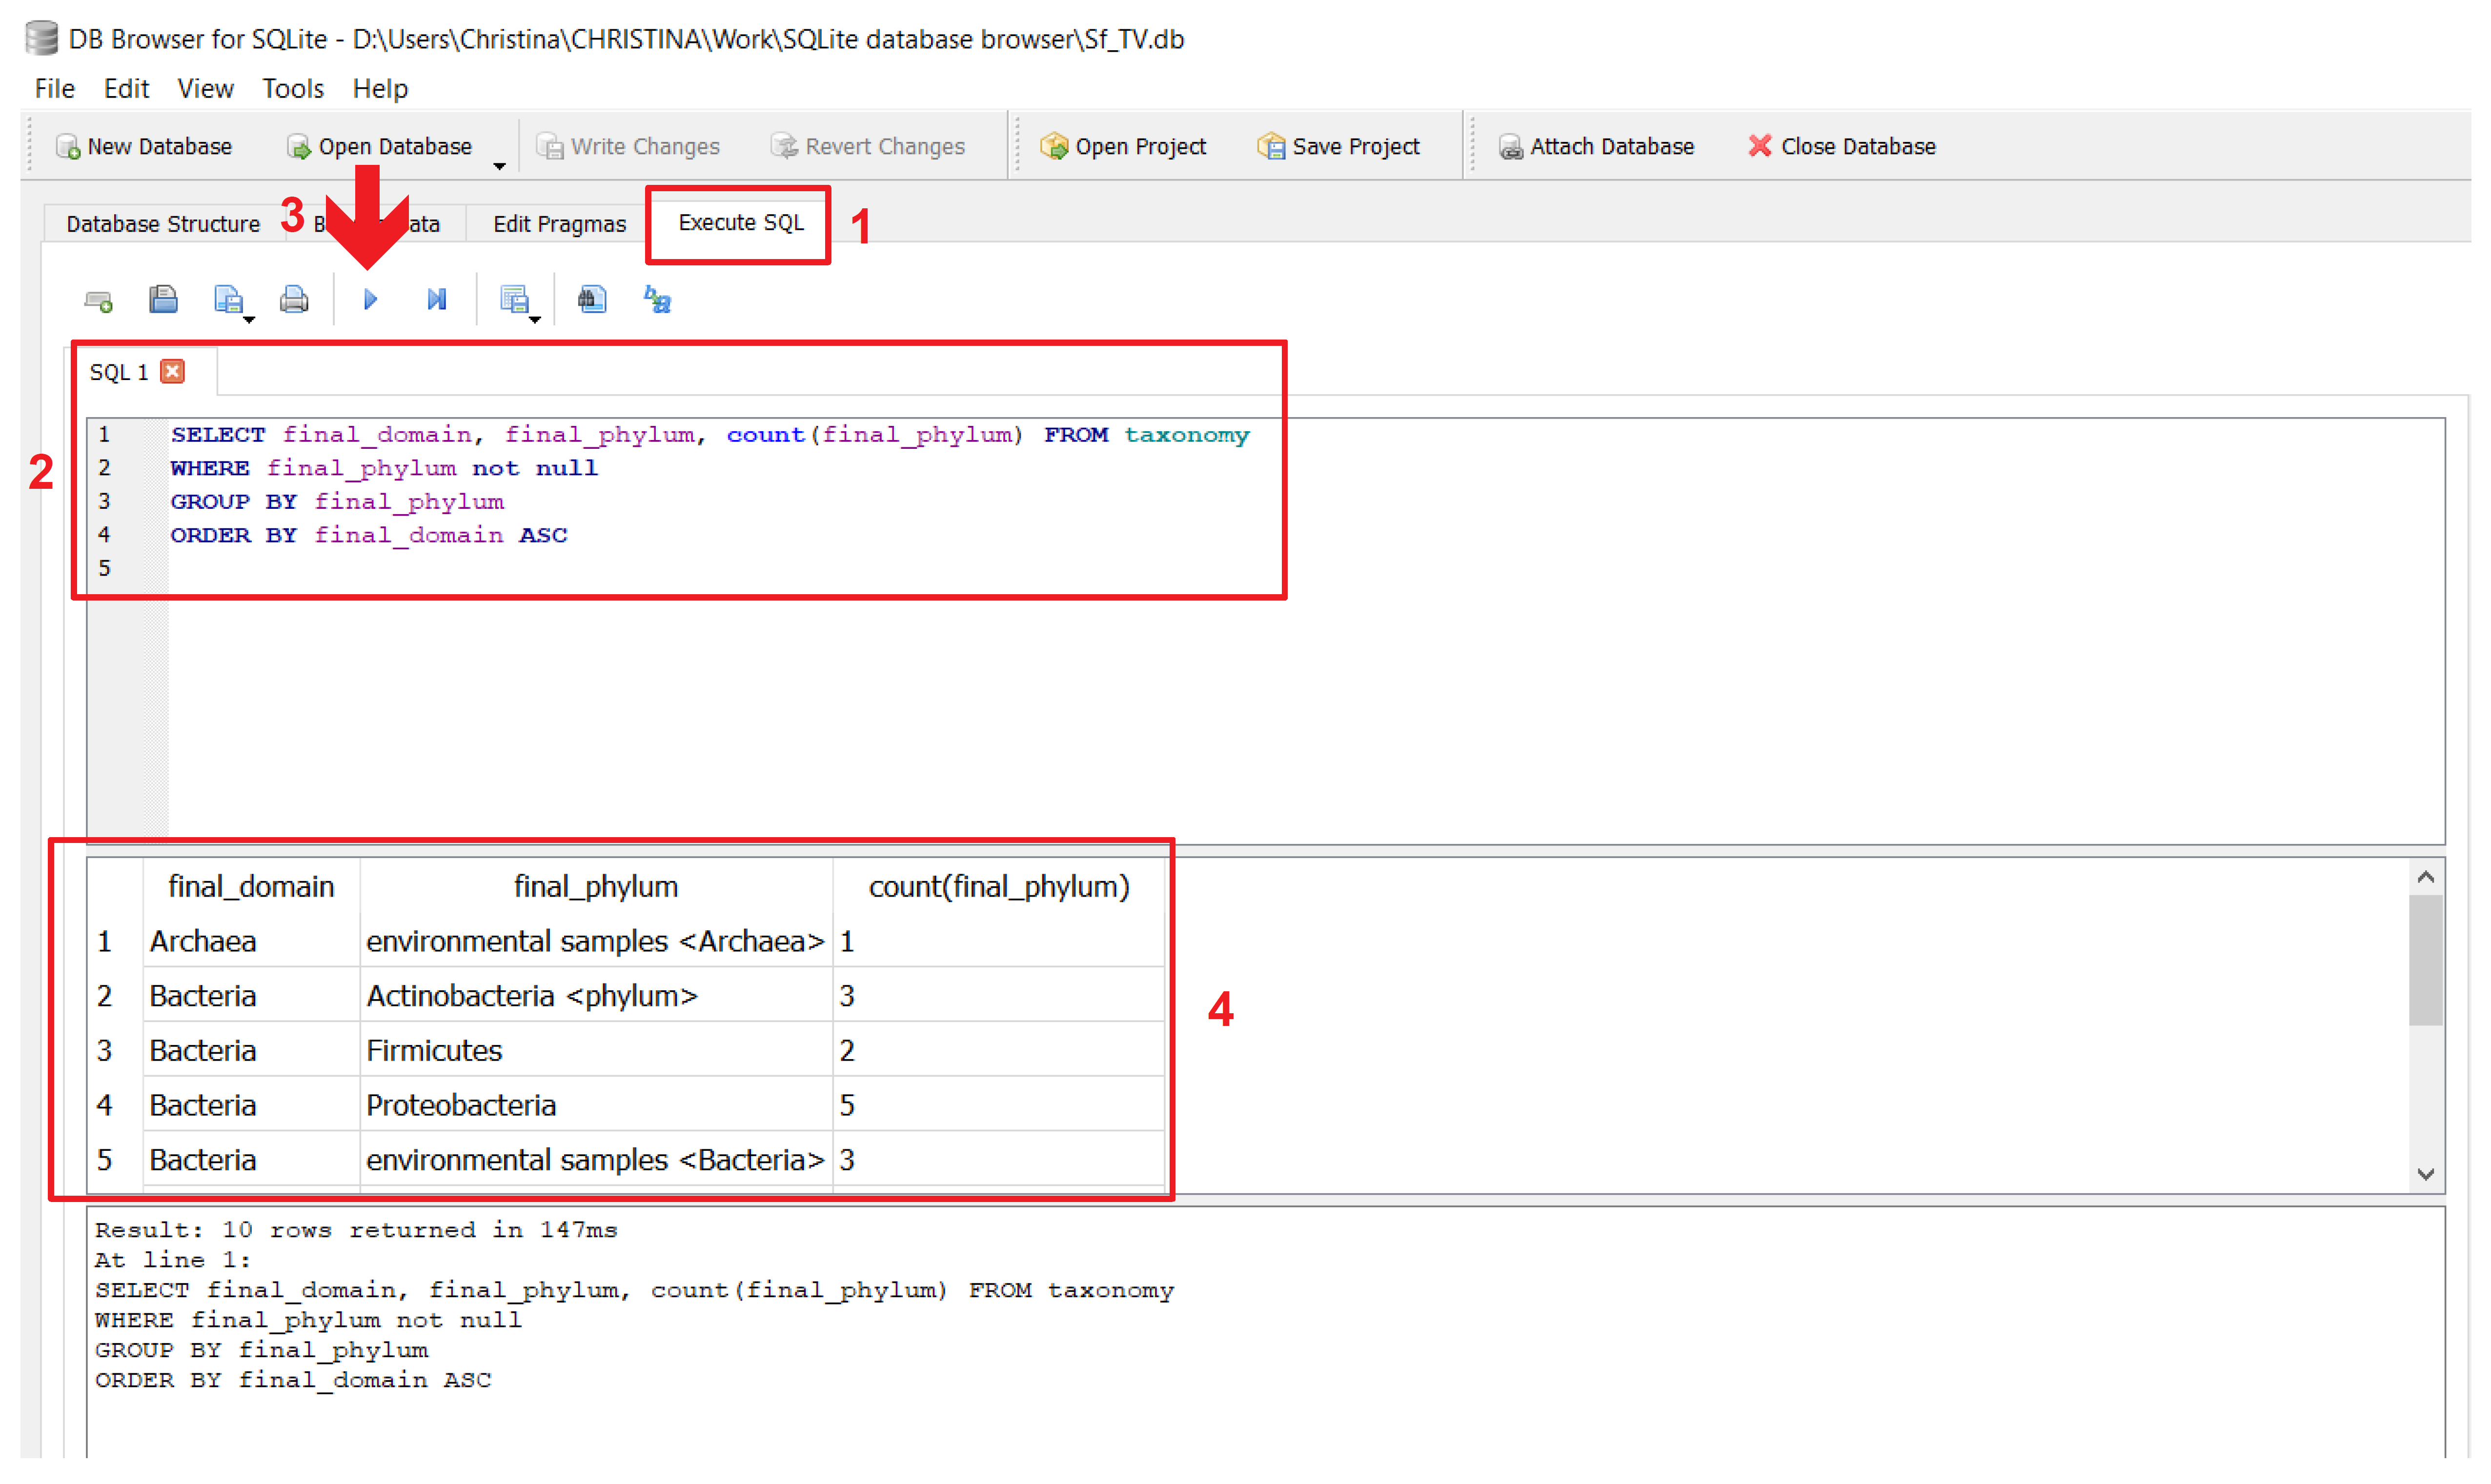


**Figure S2. Viewing the general taxonomic profile up to Phylum level.** 1. in the “Execute SQL” leaf, 2. paste the first set of commands contained in *analysing_taxonomy.txt* (*1. To visualise the general taxonomic profile up to Phylum level*), and 3. execute them with “Play”; 4. after the commands have been executed successfully, a table appears in the middle panel showing the number of sequences (“count(final_phylum)” column) assigned to each Phylum (“final_phylum” column).


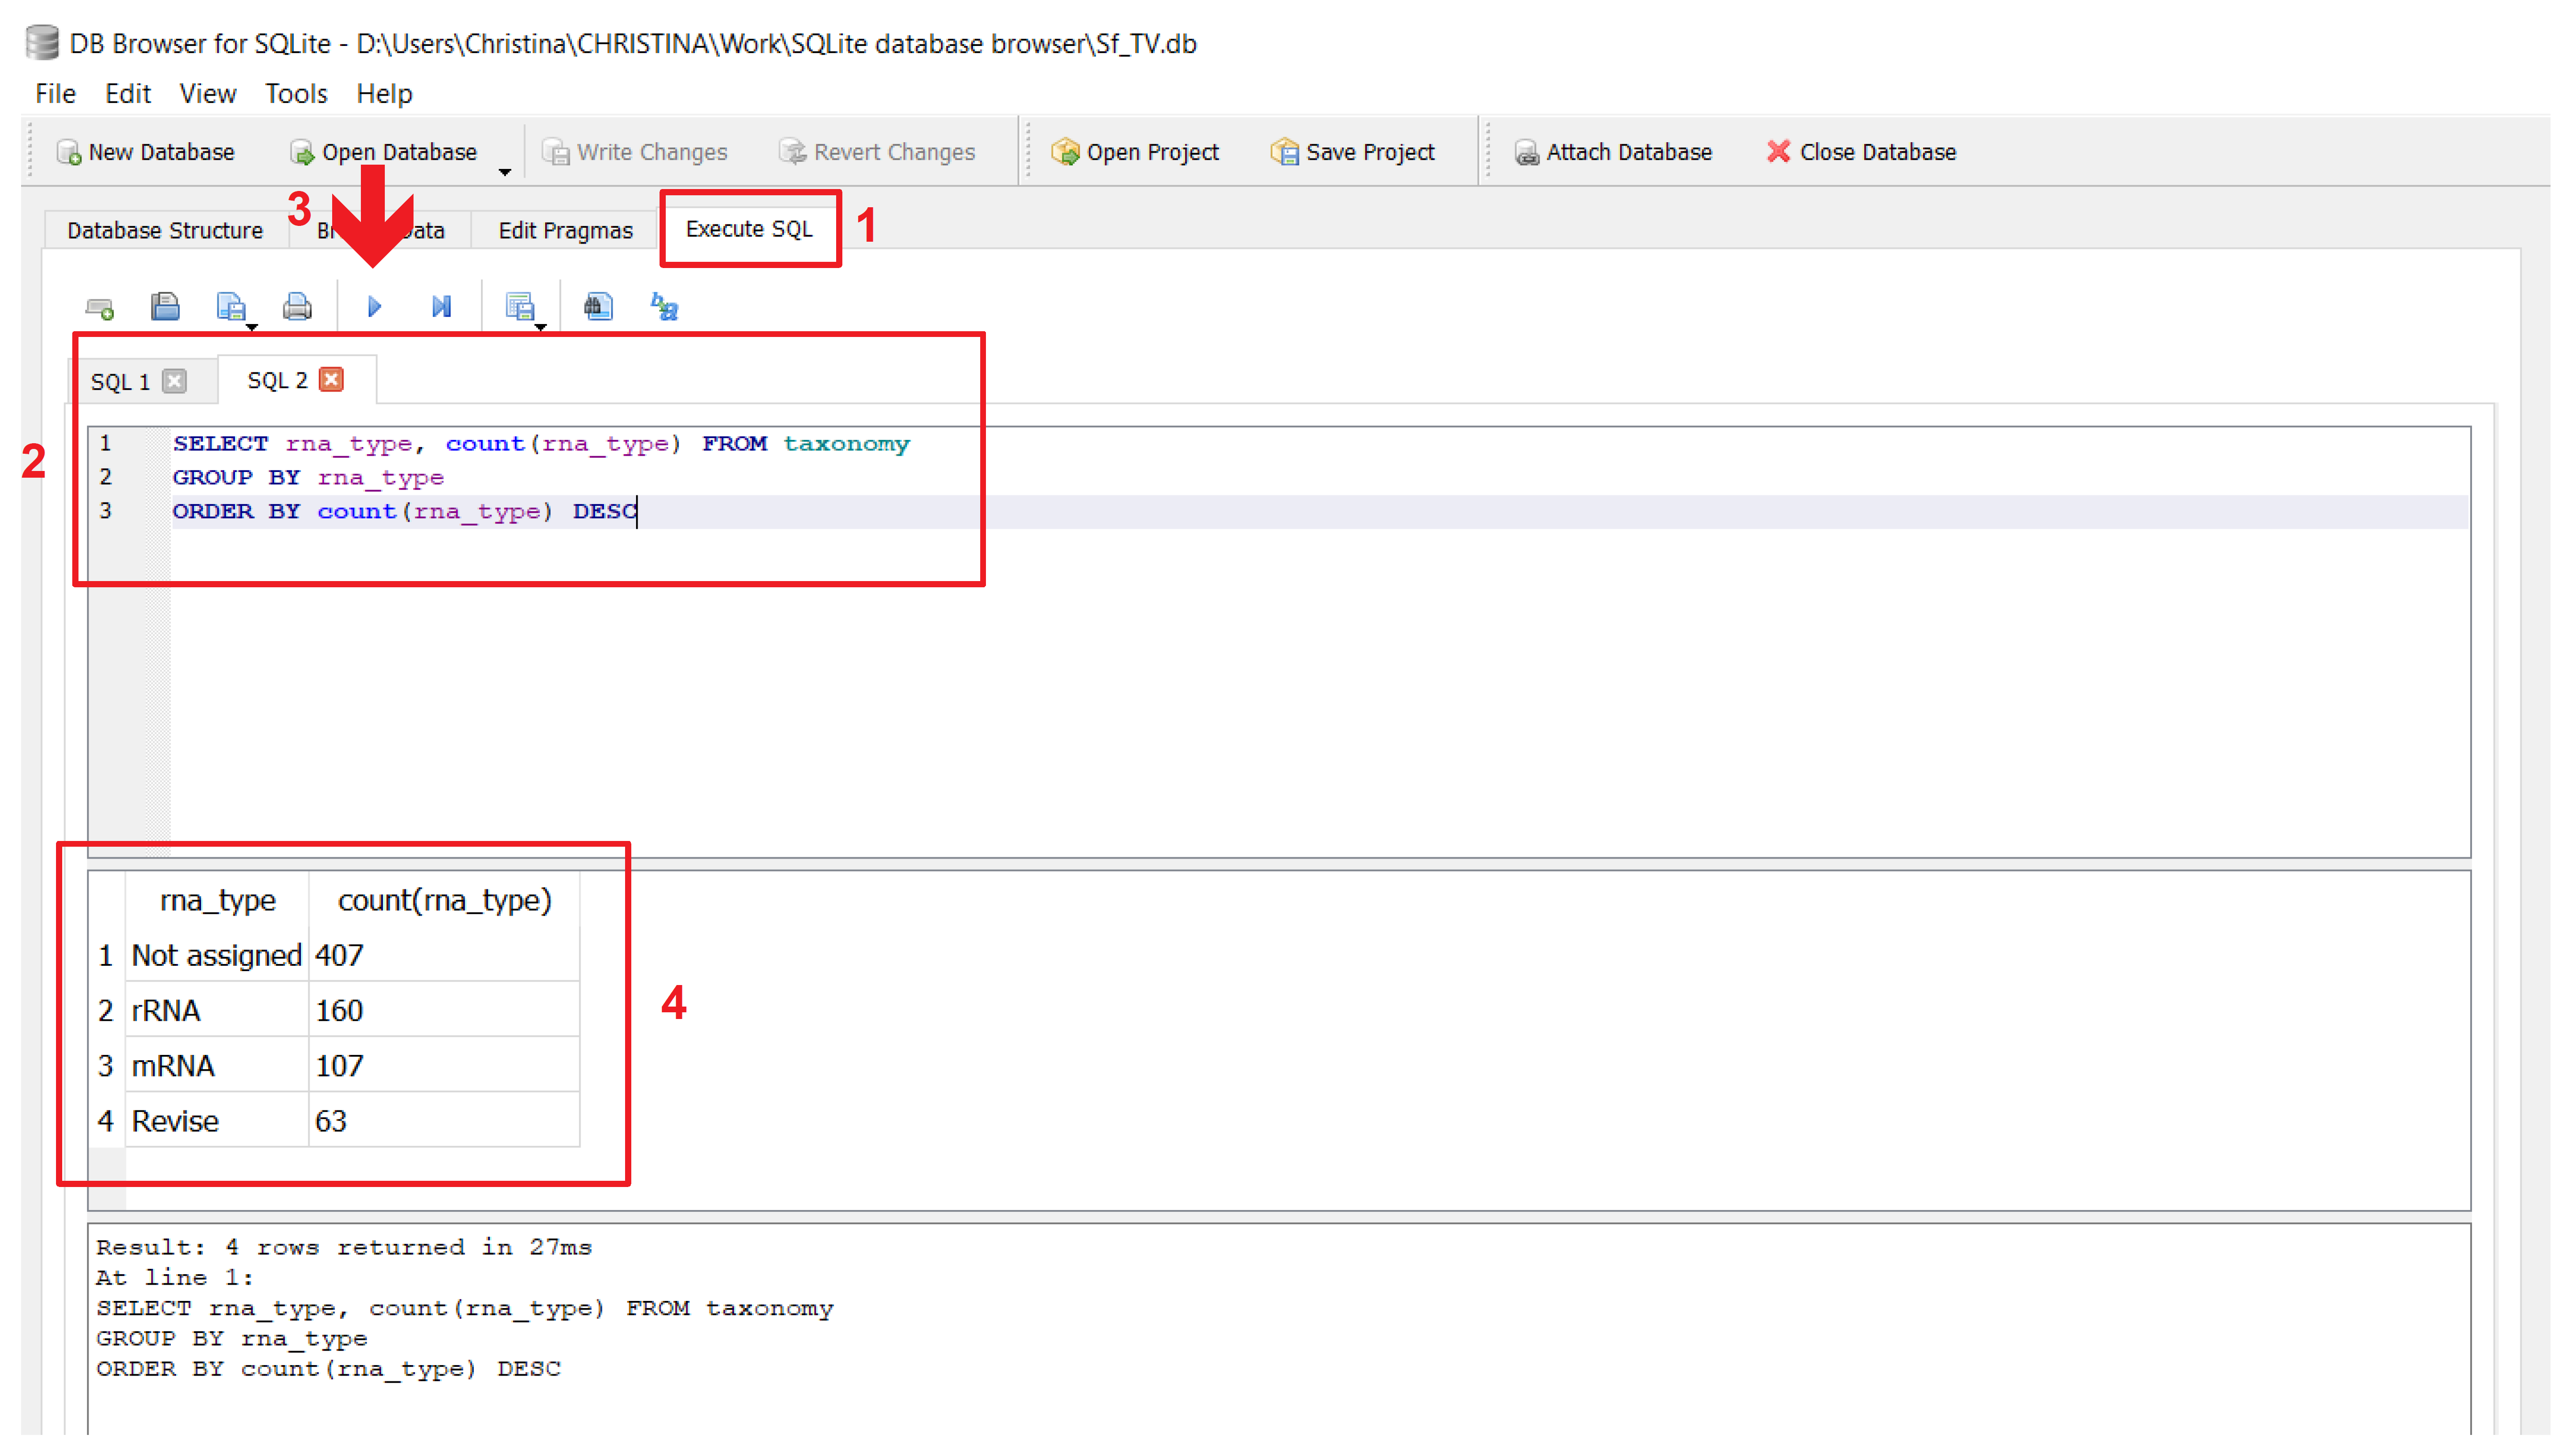


**Figure S3. Viewing the distribution by transcript category.** 1. in the “Execute SQL” leaf, 2. paste the second set of commands contained in *analysing_taxonomy.txt* (*2. To visualise transcript distribution*), and 3. execute them with “Play”; 4. after the commands have been executed successfully, a table appears in the middle panel showing the number of sequences (“count(rna_type)” column) assigned to each transcript category (in the “rna_type column”, “rRNA”, “mRNA”, “Not Assigned” or “Revise”).


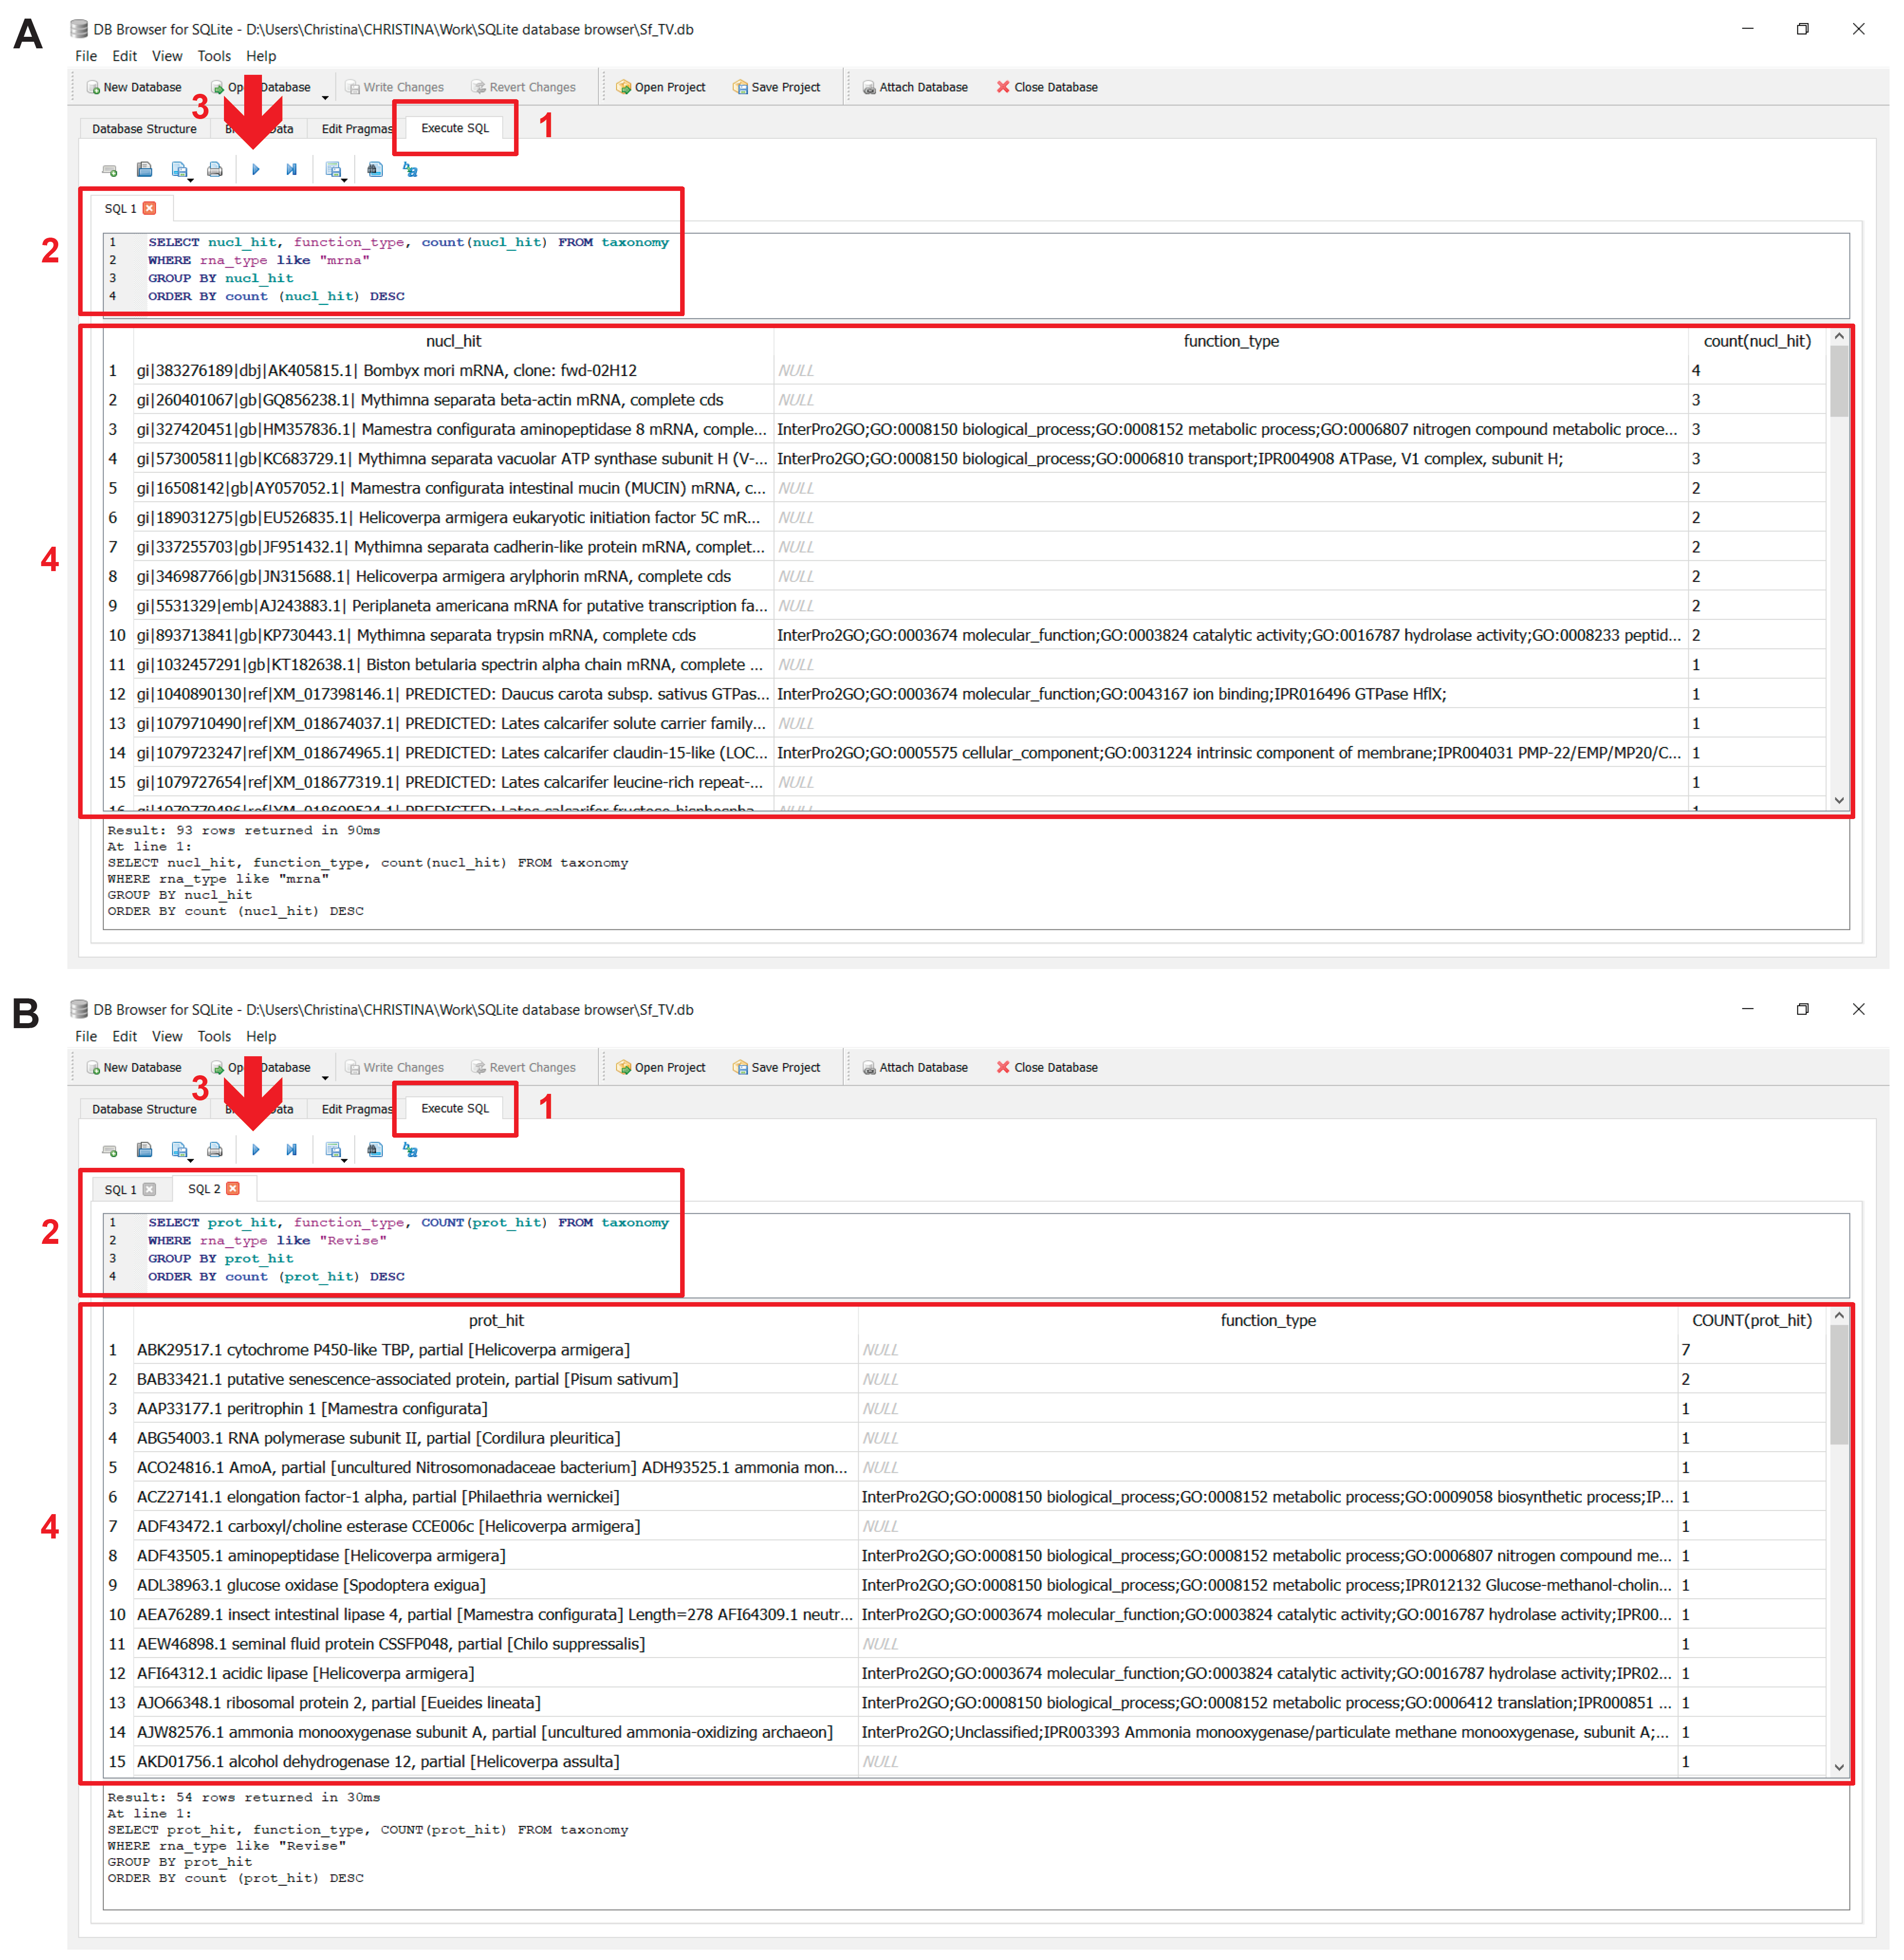


**Figure S4. Viewing a non-redundant list of hits obtained from both homology searches.** A. To browse nucleotide hits from the "mRNA" category: 1) in the “Execute SQL” leaf, 2) paste the third set of commands contained in *analysing_taxonomy.txt* (*3. To visualise non-redundant hits from the nucleotide homology search in the "mRNA" category*), and 3) execute them with “Play”; 4) after the commands have been executed successfully, a table appears in the middle panel showing the number of contigs assigned to a certain nucleotide hit from the “mRNA” category (“nucl_hit” column) and its functional assignment when present (“function_type” column). B. To browse protein hits from the "Revise" category: 1) in the “Execute SQL” leaf, 2) paste the fourth set of commands contained in *analysing_taxonomy.txt* (*4. To visualise non-redundant hits from the protein homology search in the "Revise" category*), and 3) execute them with “Play”; 4) after the commands have been executed successfully, a table appears in the middle panel showing the number of sequences assigned to a certain protein hit from the “Revise” category and its functional assignment when present.


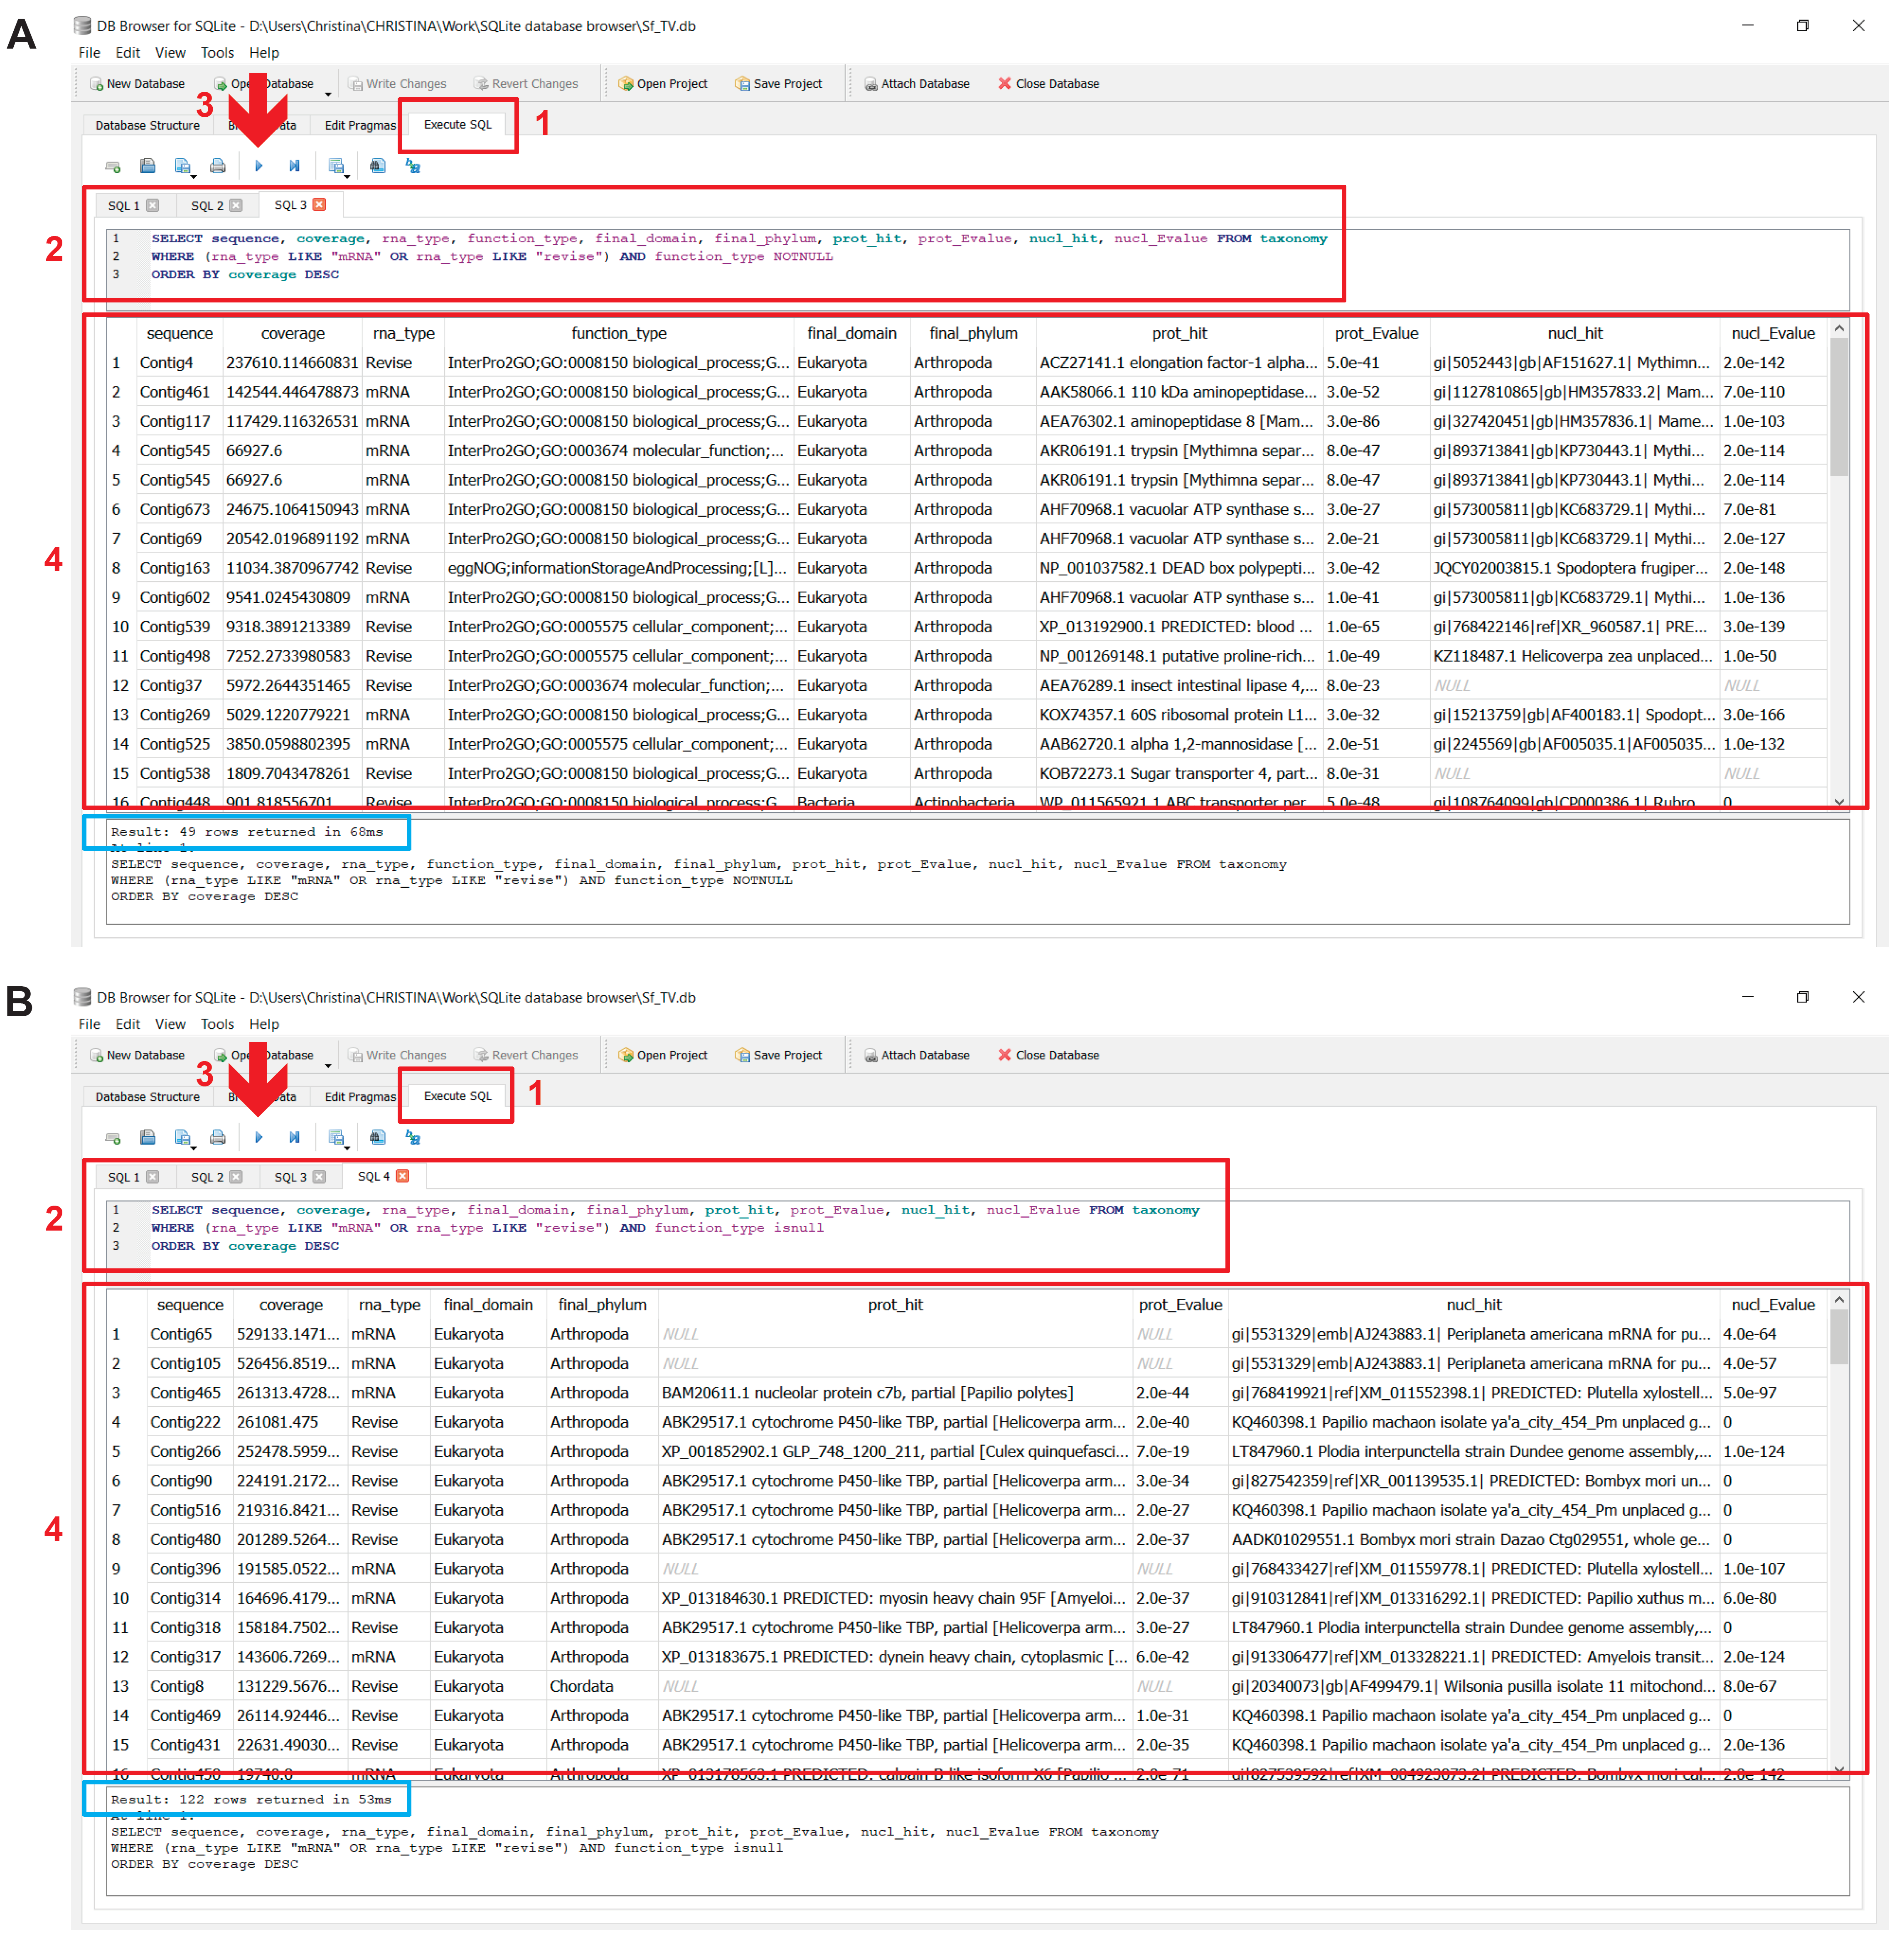


**Figure S5. Viewing the “mRNA” and “Revise” transcripts with and without functional database assignment.** A. To visualise all the "mRNA" and "revise" rows that DO have ip2go/eggnog assignment: 1) in the “Execute SQL” leaf, 2) paste the fifth set of commands contained in *analysing_taxonomy.txt* (*5. To visualise "mRNA" and "revise" rows with ip2go/eggnog assignment in descending order*), and 3) execute them with “Play”; 4) after the commands have been executed successfully, a table appears in the middle panel showing all the contigs that were classified by the functional databases (“function_type” column), ordered by coverage; for these contigs, “sequence”, “coverage”, “rna_type” (mRNA or Revise), “function_type” (ip2go/eggnog assignment), “final_domain”, “final_phylum”, “prot_hit”, “prot_Evalue”, “nucl_hit”, and “nucl_Evalue” are shown. The light blue rectangle indicates the number of contigs that were classified by the functional databases (49 contigs). B. To visualise all the "mRNA" and "revise" rows that DO NOT have ip2go/eggnog assignment: 1) in the “Execute SQL” leaf, 2) paste the sixth set of commands contained in *analysing_taxonomy.txt* (*6. To visualise "mRNA" and "revise" rows without ip2go/eggnog assignment in descending order*), and 3) execute them with “Play”; 4) after the commands have been executed successfully, a table appears in the middle panel showing all the contigs that were not classified by the functional databases, ordered by coverage; for these contigs, “sequence”, “coverage”, “rna_type”, “final_domain”, “final_phylum”, “prot_hit”, “prot_Evalue”, “nucl_hit”, and “nucl_Evalue” are shown. The light blue rectangle indicates the number of contigs that were not classified by the functional databases (122 contigs).
